# 1 **Contrasting patterns of genetic admixture explain the phylogeographic history of** 2 **Iberian high mountain populations of midwife toads**

3  
4 Federica Lucati<sup>1,2\*</sup>, Alexandre Miró<sup>2</sup>, Jaime Bosch<sup>3,4</sup>, Jenny Caner<sup>2</sup>, Michael Joseph  
5 Jowers<sup>5,6</sup>, Xavier Rivera<sup>7</sup>, David Donaire-Barroso<sup>8</sup>, Rui Rebelo<sup>1</sup> and Marc Ventura<sup>2\*</sup>

6  
7 <sup>1</sup> Centre for Ecology, Evolution and Environmental Changes (cE3c), Faculty of  
8 Sciences, University of Lisbon, Lisbon, Portugal

9  
10 <sup>2</sup> Center for Advanced Studies of Blanes (CEAB-CSIC), Blanes, Catalonia, Spain

11  
12 <sup>3</sup> Museo Nacional de Ciencias Naturales-CSIC, Madrid, Spain

13  
14 <sup>4</sup> Research Unit of Biodiversity - CSIC/UO/PA, Universidad de Oviedo, Mieres, Spain

15  
16 <sup>5</sup> Centro de Investigação em Biodiversidade e Recursos Genéticos (CIBIO/InBIO),  
17 Universidade do Porto, Campus Agrario De Vairão, Vairão, Portugal

18  
19 <sup>6</sup> National Institute of Ecology (NIE), Seocheon, Republic of Korea

20  
21 <sup>7</sup> Catalan Society of Herpetology, Leonardo Da Vinci square 4-6, Barcelona, Catalonia,  
22 Spain

23  
24 <sup>8</sup> Calle Mar Egeo 7, Jerez de la Frontera, Cadiz, Spain

25  
26  
27 \* Corresponding authors

28 E-mail: federicalucati@hotmail.com (FL)

29 E-mail: ventura@ceab.csic.es (MV)

## 30 Abstract

31 Multiple Quaternary glacial refugia in the Iberian Peninsula, commonly known  
 32 as “refugia within refugia”, allowed diverging populations to come into contact and  
 33 admix, potentially boosting substantial mito-nuclear discordances. In this study, we  
 34 employ a comprehensive set of mitochondrial and nuclear markers to shed light onto  
 35 the drivers of geographical differentiation in Iberian high mountain populations of  
 36 the midwife toads *Alytes obstetricans* and *A. almogavarii* from the Pyrenees, Picos de  
 37 Europa and Guadarrama Mountains. In the three analysed mountain regions, we  
 38 detected evidence of extensive mito-nuclear discordances and/or admixture  
 39 between taxa. Clustering analyses identified three major divergent lineages in the  
 40 Pyrenees (corresponding to the eastern, central and central-western Pyrenees),  
 41 which possibly recurrently expanded and admixed during the succession of glacial-  
 42 interglacial periods that characterised the Late Pleistocene, and that currently follow  
 43 a ring-shaped diversification pattern. On the other hand, populations from the Picos  
 44 de Europa mountains (NW Iberian Peninsula) showed a mitochondrial affinity to  
 45 central-western Pyrenean populations and a nuclear affinity to populations from the  
 46 central Iberian Peninsula, suggesting a likely admixed origin for Picos de Europa  
 47 populations. Finally, populations from the Guadarrama Mountain Range (central  
 48 Iberian Peninsula) were depleted of genetic diversity, possibly as a consequence of a  
 49 recent epidemic of chytridiomycosis. This work highlights the complex evolutionary

50 history that shaped the current genetic composition of high mountain populations,  
51 and underscores the importance of using a multilocus approach to better infer the  
52 dynamics of population divergence.

53

## 54 **Introduction**

55 Patterns of population structure and genetic divergence within species  
56 primarily result from their evolutionary history and contemporary dispersal  
57 capability, and these processes are in turn responsible of generating specific  
58 phylogeographic signatures [1]. The description of these signatures return valuable  
59 information on the mechanisms underlying spatial patterns of contemporary genetic  
60 diversity and structure, and this knowledge can ultimately help in the conservation  
61 and management of species and populations under global change [2].

62 Organisms with limited dispersal capacity and a typically allopatric type of  
63 speciation, such as many amphibians, generally present complex genetic signals at  
64 lineage borders resulting in reticulate patterns [3-5]. A number of mechanisms are  
65 involved in the generation of reticulate patterns in phylogeography, among them  
66 contact zones, hybridisation and introgression [6]. Such mechanisms, among others,  
67 may result in the formation of discordant patterns of variation among genetic  
68 markers (i.e. mito-nuclear discordances, e.g. [4, 7, 8]). As a consequence, these

69 discordances represent a powerful source of insights into the evolutionary history of  
70 species.

71         Quaternary climatic fluctuations had a major impact on worldwide biotas and  
72 organisms, reshaping the distribution of species and modelling their genetic structure  
73 [9, 10]. In Europe, it is acknowledged that the Iberian Peninsula has served as one of  
74 the most important refugia for temperate species during periods of climatic  
75 instability [11]. Growing evidence has revealed that in this region, characterized by a  
76 great variety of climatic and ecological conditions, multiple isolated refugia were  
77 present, which promoted genetic diversification and ultimately determined complex  
78 phylogeographic patterns in a number of taxa (the "refugia within refugia" scenario;  
79 [11, 12]). In this context, Iberian mountain ranges played a major role in favouring  
80 survival throughout the Pleistocene. The Iberian Peninsula has several mountain  
81 ranges that permitted flexibility and survival of populations through altitudinal shifts,  
82 allowing for movements up or down the mountains in search of suitable  
83 microclimates as the temperatures changed [11, 13]. Nevertheless, there is a lack of  
84 knowledge on the phylogeographic history of European species with Iberian  
85 distribution to understand the role of glacial refugia throughout the different  
86 mountain regions within Iberia [11].

87         The common midwife toad (*Alytes obstetricans*) is a small anuran widely  
88 distributed in central and western Europe. It is a common species that inhabits a wide  
89 variety of habitats between sea level and 2 400 meters above sea level (m.a.s.l.) in

90 the Pyrenees [14, 15]. Major threats to the species are related to habitat loss and  
 91 fragmentation through pollution, commercial and agricultural development,  
 92 introduction of non-native species, and more recently emergent diseases such as  
 93 chytridiomycosis, which is caused by the chytrid fungus *Batrachochytrium*  
 94 *dendrobatidis* (*Bd*) [14-16]. *Bd* has led to episodes of mass mortality in *A.*  
 95 *obstetricans*, which is known to be highly susceptible to the pathogen [16-18].  
 96 Furthermore, fatal outbreaks of chytridiomycosis in Iberia were more frequent at  
 97 higher elevations [19].

98 *Alytes obstetricans* represents an excellent biological system to study  
 99 phylogeographic patterns derived from post-glacial expansion, such as contact zones  
 100 and hybridisation. The species shows strong genetic subdivisions in the Iberian  
 101 Peninsula, indicative of past population isolation [20]. Until recently, *A. obstetricans*  
 102 was defined by six divergent and geographically structured mtDNA haplogroups  
 103 (named A to F; [20, 21]), delineating as many genetic lineages that probably  
 104 interbreed in zones of secondary contact (Fig 1). Each of the six mitochondrial  
 105 lineages corresponded to a unique nuclear microsatellite clade, except for lineage B  
 106 that harboured two distinct microsatellite clusters [22]. More recently, the  
 107 subspecies *almogavarii* (mtDNA lineages E-F) was proposed as an incipient species  
 108 (i.e. *A. almogavarii*; [23]) by RAD-sequencing analysis, and mtDNA lineage E described  
 109 as a novel subspecies (*A. a. inigoï*) [24].

110

111 **Fig 1. Geographic location of sampling sites for *Alytes obstetricans/almogavarii*.**

112 The three analysed mountain regions are circled in white. In the Pyrenees, dashed  
113 lines delimit the three geographic sections (eastern, central and western Pyrenees).  
114 For population codes and further information on sampling sites see S1 Table. The  
115 inset map shows the distribution of the main lineages: orange - ND4 haplogroups E-F  
116 (*A. almogavarii*), yellow - ND4 haplogroup B (*A. o. obstetricans*), blue - ND4  
117 haplogroup A (*A. o. pertinax*), red - ND4 haplogroup C (*A. o. boscai*), green - ND4  
118 haplogroup D (*A. o. boscai*), black - unclear (adapted from Dufresnes and Martínez-  
119 Solano [23]).

120

121

122 Previous studies revealed a complex scenario of relationships and admixture  
123 between lineages of *A. obstetricans/almogavarii*, evidencing the existence of contact  
124 and hybrid zones at some lineage borders [20, 23, 25, 26]. Yet, there has been little  
125 attempt on identifying the causes and consequences of such admixture.

126 Furthermore, none of these studies was specifically focused on high mountains,  
127 which are well-known hotspots of genetic diversity and have been shown to play a  
128 considerable role in separating well-differentiated intraspecific clades in numerous  
129 species (e.g. [4, 27]). Here, we employ a multilocus approach combined with  
130 comprehensive sample collection across four of the defined mtDNA genetic lineages  
131 to analyse the geographical differentiation in *A. obstetricans/almogavarii*, placing

132 special focus on three high mountain regions in the Iberian Peninsula: Pyrenees, Picos  
133 de Europa and Guadarrama Mountain Range. Specifically, we aimed to (1) describe  
134 finer-scale geographical patterns of genetic diversity and structure in high mountain  
135 populations of *A. obstetricans/almogavarii*, compare different scenarios of  
136 population divergence and explore the role of glacial refugia; (2) identify putative  
137 contact zones and assess patterns of admixture; and (3) better delineate the  
138 geographic distribution of major genetic lineages. We also provide deeper analyses  
139 on the genetic status of populations that have been hit by a recent chytridiomycosis  
140 outbreak. To this end, we combined DNA sequence (mitochondrial and nuclear) and  
141 microsatellite data for the first time in an *A. obstetricans/almogavarii* study. Thus,  
142 herein we provide new insights on the recent evolutionary history and the present  
143 processes that have shaped and are currently shaping Iberian populations of *A.*  
144 *obstetricans/almogavarii*.

145

## 146 **Materials and Methods**

### 147 **Sampling and DNA extraction**

148 Sampling was conducted mainly in the period 2009–2018 across northern and  
149 central Iberian Peninsula, as it is known to host most of the genetic diversity of the  
150 species [20, 22]. We paid special emphasis on three mountain regions: Pyrenees,  
151 Picos de Europa mountains (Cantabrian Mountains, NW Iberian Peninsula) and

Guadarrama Mountain Range (central Iberian Peninsula), although we also took some additional samples from neighbouring lowland localities (Fig 1, Tables 1 and S1). We sampled 51 sites in the Pyrenees (1010–2447 m.a.s.l.), 13 in Picos de Europa (1120–2079 m.a.s.l.), nine in Guadarrama Mountains (1527–1980 m.a.s.l.), and 32 sites in lowland areas (52–992 m.a.s.l.), totalling 890 individuals from 105 sampling sites (Table 1). Lowland populations were grouped according to their geographic proximity to the analysed mountain regions (Table 1). A subset of samples was used in a previous study [18].

**Table 1. Genetic diversity parameters as estimated from microsatellites for each analysed mountain region and corresponding lowland areas.**

|                                    | Alt.      | N <sub>pops</sub> | N   | Na    | Ar    | PAAr  | H <sub>O</sub> | H <sub>E</sub> | N <sub>e</sub> | ND4 haps    |
|------------------------------------|-----------|-------------------|-----|-------|-------|-------|----------------|----------------|----------------|-------------|
| Eastern Pyrenees                   | 1010-2406 | 17                | 144 | 13.47 | 5.310 | 0.780 | 0.480          | 0.701          | 14-51          | 28(F)       |
| Eastern Pyrenees – lowland         | 62-948    | 9                 | 21  | 8.588 | 5.310 | 0.830 | 0.460          | 0.691          | -              | 11(F)       |
| Central Pyrenees                   | 1211-2003 | 9                 | 52  | 10.82 | 5.130 | 0.920 | 0.401          | 0.651          | 68             | 15(E), 4(B) |
| Central Pyrenees – lowland         | 567       | 1                 | 2   | -     | -     | -     | -              | -              | -              | 2(E)        |
| Central-western Pyrenees           | 1043-2447 | 25                | 284 | 14.12 | 5.240 | 0.990 | 0.377          | 0.708          | 12-84          | 61(B)       |
| Central-western Pyrenees – lowland | 992       | 1                 | 1   | -     | -     | -     | -              | -              | -              | 1(B)        |
| Picos de Europa                    | 1120-2079 | 13                | 202 | 12.71 | 5.740 | 1.080 | 0.595          | 0.789          | 19-160         | 31(B)       |
| Picos de Europa – lowland          | 464-928   | 3                 | 3   | -     | -     | -     | -              | -              | -              | 3(B)        |
| Guadarrama                         | 1527-1980 | 9                 | 112 | 7.529 | 3.940 | 0.580 | 0.442          | 0.613          | 5-15           | 25(A)       |
| Guadarrama – lowland               | 52-830    | 18                | 57  | 14.53 | 6.580 | 1.080 | 0.620          | 0.805          | 70             | 36(A), 2(B) |

Alt. – altitudinal range, N<sub>pops</sub> – number of populations, N – sample size for microsatellites, Na – mean number of alleles, Ar – allelic richness standardized for sample size, PAAr – rarefied private allelic richness standardized for sample size, H<sub>O</sub> – observed heterozygosity, H<sub>E</sub> – expected heterozygosity, N<sub>e</sub> – range of effective population size, ND4 haps – occurrence and code (in parentheses) of mitochondrial ND4 haplogroups identified in each deme.



171 Tissue samples were collected via tail clipping in the case of larvae and toe  
172 clipping in the case of adults. Samples were stored in absolute ethanol and  
173 maintained at -20 °C. Genomic DNA was extracted using QIAGEN DNeasy Blood &  
174 Tissue Kit (Qiagen, Hilden, Germany) according to the manufacturer's protocol, or  
175 following the HotSHOT method [28], in a final volume of 100 µl for toe clips and 250  
176 µl for tail clips.

177

## 178 **Nuclear and mitochondrial genes sequencing**

179 We amplified five gene regions, including four mitochondrial fragments  
180 (cytochrome *b* gene – *cyt-b*; 12S rRNA gene – 12S; 16S rRNA gene – 16S; and NADH  
181 dehydrogenase subunit 4 gene and adjacent tRNAs – ND4) and one nuclear gene ( $\beta$ -  
182 fibrinogen intron 7 –  $\beta$ -fibint7). Details on primers used and amplification conditions  
183 are provided in S1 Appendix.

184 Resulting sequences were aligned using the ClustalW algorithm in MEGA 7  
185 with default settings [29]. Phasing of the nuclear intron  $\beta$ -fibint7 was performed  
186 following Gonçalves et al. [20]. Briefly, we used the program SeqPHASE [30] to format  
187 the input files, and the Bayesian algorithm implemented in PHASE 2.1.1 [31, 32] to  
188 infer phased haplotypes. PHASE was run three times using default values, to check  
189 for consistency of haplotype estimation across runs.

190

## 191 **Microsatellite screening and estimation of genetic diversity**

192 878 individuals from 102 localities were screened for 17 previously  
193 characterised microsatellite loci combined in five multiplexes [21]. Fragments were  
194 sized with LIZ-500 size standard and binned using Geneious 11.0.5 [33].

195 The presence of potential scoring errors, large allele dropout and null alleles  
196 was tested using MICRO-CHECKER 2.2.3 [34]. We tested for linkage disequilibrium  
197 between loci and for departures from Hardy-Weinberg equilibrium (HWE) in each  
198 population and for each locus using GENEPOP 4.2 [35]. The Bonferroni correction was  
199 applied to adjust for multiple comparisons ( $\alpha = 0.05$ ; [36]).

200 Genetic diversity parameters were calculated for populations with  $\geq$  five  
201 genotyped individuals and for each analysed mountain region and corresponding  
202 lowland areas. Observed ( $H_o$ ) and expected heterozygosity ( $H_e$ ) and mean number of  
203 alleles ( $N_a$ ) were obtained with GenAlEx 6.5 [37]. Allelic richness ( $Ar$ ) standardized for  
204 sample size and rarefied private allelic richness (PAAr – calculated only at the genetic  
205 cluster level) were calculated in HP-RARE 1.1 [38]. We estimated the inbreeding  
206 coefficient ( $F_{IS}$ ) within each population with GENETIX 4.05.2 [39].

207

## 208 **Phylogenetic analyses**

209 For ND4, we estimated genealogic relationships among haplotypes using  
210 Haploviewer [40]. The optimal nucleotide-substitution model was determined by

211 jModelTest 2.1.3 [41], under the Akaike Information Criterion (AIC). The phylogeny  
212 was estimated with RAxML 7.7.1 [42] using a Maximum Likelihood (ML) approach.  
213 The program was run with a gamma model of rate heterogeneity and no invariant  
214 sites (GTRGAMMA), applying 1 000 bootstrap replicates. The best tree was selected  
215 for haplotype network construction in Haploviewer, based on all sequences retrieved  
216 from GenBank and this study. Furthermore, genetic diversity parameters, namely  
217 number of haplotypes (H) and polymorphic sites (S), as well as haplotype (Hd) and  
218 nucleotide ( $\Pi$ ) diversity indices, were estimated for the whole dataset and for each  
219 analysed mountain region and corresponding lowland areas using DnaSP 6.11.01  
220 [43].

221 In order to describe the affinities of the different genetic lineages described in  
222 *A. obstetricans/almogavarii*, we constructed a species tree with the five partially  
223 sequenced genes using the multispecies coalescent approach in \*BEAST, as  
224 implemented in BEAST 2.6.2 (S1 Fig) [44]. The substitution model for each marker  
225 was determined by jModelTest. We set a strict molecular clock model and a Yule  
226 speciation prior. The clock and tree models for mtDNA markers were linked. We  
227 defined five groups in *A. obstetricans/almogavarii*, corresponding to the four main  
228 population lineages identified in the haplotype network (A, B, E, F) and further  
229 subdividing lineage B into two groups (central-western Pyrenees and Picos de  
230 Europa; see Results). Since \*BEAST does not take into account the possibility of gene  
231 flow between lineages, samples from localities where more than one mtDNA

haplogroup was found were excluded from the analysis [20]. Samples of *A. maurus* were used as outgroup. Two independent MCMC chains were run for 200 million generations each, sampling trees and parameter estimates every 5 000. Tracer 1.6 [45] was used to check for stationarity and convergence of MCMC chains. A maximum clade credibility tree was constructed in TreeAnnotator 2.6.2 and visualized using FigTree 1.4.3 (<http://tree.bio.ed.ac.uk/software/figtree>), discarding the first 10% generations as burn-in, while the node heights were set to mean heights.

## Genetic structure

For microsatellites, population structure was inferred using different approaches (S1 Fig): a) a Discriminant Analysis of Principal Components (DAPC) and a Principal Component Analysis (PCA), using the ADEGENET package 2.1.1 [46] in R 3.5.1 [47]; b) a Bayesian cluster analysis implemented in STRUCTURE 2.3.4 [48]; c) a neighbour-joining (NJ) tree using the program POPTREEW [49]; and d) a spatial-based clustering approach implemented in the R package Tess3R 1.1.0 [50], which incorporates geographic coordinates in estimating sample ancestry coefficients. Details on models and parameters used are outlined in S1 Appendix.

To further explore the genetic differentiation between the defined genetic units, we calculated pairwise  $F_{ST}$  for both ND4 and microsatellites. Computations were performed in Arlequin 3.5.2.2 [51] in the case of ND4 and in GenAlEx in the case

253 of microsatellites, with 1 000 permutations to assess statistical significance. Similarly,  
254 to partition genetic variability at different hierarchical levels (among genetic clades,  
255 among populations within clades and within populations), we conducted an analysis  
256 of molecular variance (AMOVA) as implemented in Arlequin, using 10 000  
257 permutations to assess significance of variance components [52]. To better  
258 understand the spatial pattern of population differentiation detected in the Pyrenees  
259 (see Results), we correlated genetic distances ( $F_{ST}$ ) of Pyrenean populations either  
260 with the Euclidean distance among populations, and with the geographic distance  
261 suggested by PCA analysis, which followed a ring-like pattern around the Pyrenean  
262 chain assuming no direct gene flow across the central Pyrenean axis (see e.g. [53] for  
263 a similar approach). The analysis was performed in GenAlEx with 1 000 permutations,  
264 including only populations with  $\geq$  five genotyped individuals ( $N = 29$ ).

265

## 266 **Effective population size**

267 The sibship assignment method implemented in Colony 2.0.6.5 was used to  
268 calculate the effective population size ( $N_e$ ) of populations with  $\geq 15$  genotyped  
269 individuals (S1 Fig) [54]. This software uses a maximum likelihood method to conduct  
270 parentage and sibship inference to estimate  $N_e$  and can accommodate null alleles and  
271 other genotyping errors. The program was run with the parameters specified in  
272 Lucati et al. [55]. During sampling care was taken to minimize the effects of sampling

273 individuals belonging to the same clutch, by collecting samples from several spots  
274 within the same sampling site.

275

## 276 **Demographic history**

277 The approximate Bayesian computation (ABC) approach, as implemented in  
278 the software DIYABC 2.1.0 [56], was used to reconstruct the history of divergence  
279 among the genetic lineages identified in *A. obstetricans/almogavarii*. Only high  
280 mountain populations were included in the analysis, as we were interested in  
281 understanding the evolutionary history of the three high mountain areas described  
282 above (S1 Fig). We grouped populations into five groups according to their  
283 geographic location. We also incorporated the information from previous studies  
284 dealing with the phylogenetics and population structure of the different subspecies,  
285 which point to a shared origin between populations from the central and eastern  
286 Pyrenees (mitochondrial ND4 haplogroups E and F in Gonçalves et al. [20] and  
287 microsatellite clusters F1n and F2n in Maia-Carvalho et al. [22]): populations from the  
288 Picos de Europa mountains (PEU) and the central-western Pyrenees (CWPY;  
289 corresponding to subspecies *A. o. obstetricans*) formed two separate groups,  
290 whereas populations from the central Pyrenees (CPY), eastern Pyrenees (EPY;  
291 corresponding to the putative incipient species *A. almogavarii*) and Guadarrama  
292 Mountains (GUA; corresponding to subspecies *A. o. pertinax*) were subdivided into  
293 three groups. We generated five different scenarios (Fig 2a): (1) null model with all

294 groups diverging simultaneously from a common ancestor, except for lineage CPY  
 295 that originates from EPY; (2) sequential splitting model directly following results from  
 296 STRUCTURE and DAPC analyses, where on the one hand populations from the  
 297 Pyrenees, and on the other GUA and PEU populations share a common origin; (3)  
 298 similar to the second one, but predicts a common origin of PEU and CWPY  
 299 populations, as suggested by ND4 haplotype network; (4) same as the previous  
 300 scenario, with a common origin between populations belonging to ND4 haplogroups  
 301 A and B, as suggested by \*BEAST analysis; and (5) where the PEU lineage was created  
 302 by admixture of CWPY and GUA populations. We performed the computations both  
 303 combining microsatellites and ND4 data, and separately for microsatellites. Further  
 304 details on model specifications and run parameters are outlined in S1 Appendix and  
 305 S2 Table.

306

307 **Fig 2. Phylogeographic scenarios tested in DIYABC and best supported models.** (a)  
 308 Scenarios tested in DIYABC considering the three analysed high mountain areas. (b)  
 309 The best supported scenarios, namely number 2 when considering only  
 310 microsatellites and number 5 when considering both mtDNA (ND4) and microsatellite  
 311 markers, with the estimated divergence times ( $t_1 - t_3$ ) of each split. Population  
 312 groups were defined on the basis of their geographic distribution and the results  
 313 from clustering analyses: eastern Pyrenees (EPY, orange), central Pyrenees (CPY,

grey), central-western Pyrenees (CWPY, pink), Picos de Europa mountains (PEU, yellow), and Guadarrama Mountain Range (GUA, blue).

316

## 317 Results

### 318 Sequence variation and genetic diversity

319 The nuclear DNA alignment ( $\beta$ -fibint7) included 20 sequences of 605 bp, while  
320 for the mitochondrial dataset we obtained 219 sequences of 654 bp for ND4, 40  
321 sequences of 325 bp for *cyt-b*, 42 sequences of 341 bp for 12S, and 40 sequences of  
322 579 bp for 16S (S1 Table). With regard to ND4, overall haplotype ( $H_d$ ) and nucleotide  
323 ( $\Pi$ ) diversities were  $0.930 \pm 0.008$  and  $0.020 \pm 0.0008$ , respectively. Across the  
324 analysed mountain regions, Guadarrama Mountains showed lower ND4 genetic  
325 diversity values ( $H_d = 0.290 \pm 0.109$ ,  $\Pi = 0.001 \pm 0.0002$ ) compared to the other  
326 regions (eastern Pyrenees:  $H_d = 0.770 \pm 0.039$ ,  $\Pi = 0.002 \pm 0.0003$ ; central Pyrenees:  
327  $H_d = 0.724 \pm 0.101$ ,  $\Pi = 0.014 \pm 0.003$ ; central-western Pyrenees:  $H_d = 0.805 \pm 0.027$ ,  
328  $\Pi = 0.002 \pm 0.0002$ ; Picos de Europa:  $H_d = 0.602 \pm 0.091$ ,  $\Pi = 0.003 \pm 0.001$ ).

329 For microsatellite loci, we did not find evidence of large allele dropout,  
330 stuttering or null allele artefacts. Similarly, no significant linkage disequilibrium or  
331 departures from HWE across populations and loci were detected after applying the  
332 Bonferroni correction. Observed ( $H_o$ ) and expected heterozygosity ( $H_e$ ) ranged from  
333 0.197 to 0.794 and from 0.222 to 0.720, respectively (mean  $H_o = 0.473$ , mean  $H_e =$



0.530; S1 Table). Mean number of alleles ( $N_a$ ) and allelic richness ( $Ar$ ) varied from 2.059 to 7.824 and from 1.270 to 5.620, respectively (mean  $N_a$  = 4.440, mean  $Ar$  = 1.873), and the inbreeding coefficient ( $F_{IS}$ ) ranged from -0.110 to 0.403 (mean = 0.157). Among the analysed mountain regions, Picos de Europa and the eastern Pyrenees were the richest regions in terms of genetic diversity, whereas Guadarrama Mountains was the poorest, with the central and central-western Pyrenees presenting intermediate values (Table 1). With regard to lowland areas, populations located in the Duero and Ebro basins (herein referred to as Guadarrama lowland localities) were the most diverse, while eastern Pyrenean localities were the least diverse.

344

## 345 **Phylogenetic analyses**

From the 219 individuals analysed for the ND4 gene we identified 34 haplotypes, of which 22 are newly described (Fig 3, S1 Table). Haplotypes were defined by 61 polymorphic sites, of which 49 were parsimony informative. The majority of newly described haplotypes were found in the Pyrenees (13), whereas only three and one haplotypes were detected in Picos de Europa and Guadarrama Mountains, respectively; the remaining five haplotypes were found in lowland localities. The haplotype network showed that haplotypes clustered into four well-differentiated haplogroups with a strong association with geography (Figs 3 and S2a): haplogroup A included sequences from Guadarrama and corresponding lowland

355 areas (corresponding to populations of *A. o. pertinax*), haplogroup F included  
356 sequences from the eastern Pyrenees (corresponding to populations of *A.*  
357 *almogavarii*), haplogroup E corresponded to populations from the central Pyrenees  
358 (*A. a. inigoi*), and haplogroup B (corresponding to populations of *A. o. obstetricans*)  
359 included sequences from the central-western Pyrenees and Picos de Europa. Within  
360 haplogroup B, sequences corresponding to central-western Pyrenean populations  
361 were clearly separated from those from Picos de Europa. In addition, in four localities  
362 we detected the presence of more than one haplogroup (Figs 3 and S2a, S1 Table):  
363 haplogroups A and B were found to co-occur in population Fte. Nueva de Bardales  
364 (T2), whereas both haplogroups B and E were found in populations Plano de Igüer  
365 (PI), Balsa Pertacua (BP) and Ibón de los Asnos (61XR).

366

367 **Fig 3. Haplotype network of ND4 sequences analysed in *Alytes***

368 *obstetricans/almogavarii*. Each circle represents a unique haplotype and the circle  
369 area is proportional to the number of sequences of a given haplotype. Blue dots  
370 correspond to inferred unsampled haplotypes. Sequences depicted in white were  
371 retrieved from GenBank. The analysed high mountain regions and corresponding  
372 lowland areas are indicated by different colours: eastern Pyrenees (EPY, orange),  
373 central Pyrenees (CPY, grey), central-western Pyrenees (CWPY, pink), Picos de Europa  
374 mountains (PEU, yellow), and Guadarrama Mountain Range and corresponding  
375 lowland areas (GUA, blue).

376

377           In order to describe the affinities between the different haplogroups, we built  
378 a consensus tree with the five sequenced gene fragments using a multispecies  
379 coalescent approach (species tree; \*BEAST). The tree placed lineage E at the base of  
380 the *A. obstetricans/almogavarii* lineages, with lineage A as sister to lineage B. Finally,  
381 lineage B split into central-western Pyrenees and Picos de Europa groups (S3 Fig).

382

### 383 **Genetic structure and effective population sizes**

384           All the clustering analyses performed on microsatellites recovered congruent  
385 results (Figs 4, 5 and S2). Regarding DAPC analysis, the optimum number of clusters  
386 was inferred to be 7 (Figs 4c, S2b and S4b). The inferred clusters were consistent with  
387 the geographic location of populations. A closer look from  $K = 2$  to  $K = 7$  revealed a  
388 spatial hierarchical genetic structure (S4a Fig), with a first split between the central-  
389 western Pyrenees and all other populations, and a subsequent subdivision of this  
390 second group into central Pyrenees—eastern Pyrenees and Guadarrama and  
391 corresponding lowland populations—Picos de Europa. At  $K = 4$ , populations from the  
392 Guadarrama Mountain Range split from lowland populations located in the Duero  
393 and Ebro basins and Picos de Europa Mountains, whereas at  $K = 5$  there was a split  
394 between the central and eastern Pyrenees. The following splits occurred within the  
395 central-western Pyrenean group. According with DAPC analysis, the PCA grouped  
396 populations according to their geographic distribution rather than by described

397 subspecies (Fig 4d). PC1 separated the Pyrenees from the Picos de Europa and  
398 Guadarrama, whereas PC2 distributed Pyrenean populations along the Pyrenean  
399 chain and contributed to the separation of the Picos de Europa and Guadarrama.  
400 STRUCTURE analysis showed patterns of genetic differentiation similar to those  
401 inferred by PCA, and identified  $K = 2$  as the best clustering solution (Figs 4a and S5):  
402 the first cluster grouped together all Pyrenean populations and the second cluster  
403 included peninsular ones. A smaller peak was detected at  $K = 7$  (Fig 4a, 5 and S5b), in  
404 agreement with DAPC-inferred clusters, but segregating populations located in the  
405 Duero and Ebro basins from Guadarrama Mountains, while splitting central-western  
406 Pyrenean populations into two groups. This partitioning into seven clusters was also  
407 supported by results of Tess3R analyses (S6 Fig). Furthermore, a higher level of  
408 genetic admixture was detected in lowland populations than in highland populations  
409 (Figs 5 and S6). More into detail, lowland *A. o. pertinax* populations generally  
410 presented the highest degree of admixture, whereas in the Pyrenees moderate levels  
411 of admixture were detected between *A. almogavarii* lineage E and *A. obstetricans* in  
412 the west, as well as between the two *A. obstetricans* lineages, but not between the  
413 two *A. almogavarii* lineages (Fig 5). In order to describe the segregation history  
414 amongst the seven groups identified by STRUCTURE, we built a NJ tree based on net  
415 nucleotide distances: the tree started at  $K = 3$  with the separation of Guadarrama and  
416 corresponding lowland populations from Picos de Europa and the Pyrenees, then at  $K$   
417  $= 4$  populations from the central and eastern Pyrenees split from central-western

418 Pyrenean populations, whereas the following splits occurred within the different  
419 major groups (Fig 4b). We also built a second NJ tree inferred from microsatellite-  
420 based  $D_A$  distances over all populations that identified five discrete lineages, which  
421 match with ND4-inferred lineages, except that populations included in haplogroup B  
422 formed two separate groups (S2d and S7 Figs). Nevertheless, the tree suggested that  
423 the pairs of lineages central Pyrenees–eastern Pyrenees and Guadarrama–Picos de  
424 Europa were more closely related with each other than with the lineage of central-  
425 western Pyrenees, which in turn appeared more distant from the rest of the lineages.

426

427 **Fig 4. Results of clustering analyses of *Alytes obstetricans/almogavarii* populations**  
428 **based on microsatellite data.** (a) STRUCTURE barplots of membership assignment for  $K =$   
429 2 and  $K = 7$ . Each individual is represented by a vertical bar corresponding to the  
430 assignment probabilities to the  $K$  cluster. White lines separate populations and black lines  
431 separate clusters. (b) Neighbour-joining tree based on net nucleotide distances among  
432 the seven clusters inferred by STRUCTURE. Arrows indicate the sequence of  
433 differentiation when  $K$  increases. (c) Summary plot from Discriminant Analysis of Principal  
434 Components (DAPC) for  $K = 7$  genetic clusters. Dots represent individuals and genetic  
435 clusters are shown as inertia ellipses. (d) Plot obtained in the Principal Component  
436 Analysis (PCA). Each dot represents one individual. Labels indicate the different genetic  
437 clusters: eastern Pyrenees (EPY, orange), central Pyrenees (CPY, grey), central-western

438 Pyrenees (CWPY, pink), Picos de Europa mountains (PEU, yellow), and Guadarrama  
439 Mountain Range (GUA, blue).

440

441 **Fig 5. Results of Bayesian clustering analysis (STRUCTURE) for K = 7 microsatellite**  
442 **groups for *Alytes obstetricans/almogavarii*.** Sampled populations are represented by  
443 pie charts highlighting the population cluster membership obtained in STRUCTURE.  
444 The inset map shows the distribution of the main lineages: orange - ND4 haplogroups  
445 E-F (*A. almogavarii*), yellow - ND4 haplogroup B (*A. o. obstetricans*), blue - ND4  
446 haplogroup A (*A. o. pertinax*), red - ND4 haplogroup C (*A. o. boscai*), green - ND4  
447 haplogroup D (*A. o. boscai*), black - unclear (adapted from Dufresnes and Martínez-  
448 Solano [23]).

449

450

451 The test of significance of pairwise  $F_{ST}$  values between the seven lineages  
452 defined by STRUCTURE was significantly different from zero ( $P < 0.01$ ; S3 Table),  
453 indicating significant genetic differences. ND4-based pairwise  $F_{ST}$  values ranged from  
454 0.951 for eastern Pyrenees–Guadarrama Mountains to 0.089 for Guadarrama  
455 Mountains–Guadarrama lowlands, whereas microsatellite-based pairwise  $F_{ST}$  values  
456 ranged from 0.222 for Guadarrama Mountains–central-western Pyrenees to 0.060 for  
457 Guadarrama lowlands–Picos de Europa. Accordingly, AMOVA analyses suggested  
458 significant structure among the seven genetic lineages ( $P < 0.001$ ; S4 Table). The

459 proportion of variation attributable to differences among lineages was lower in  
460 microsatellites (26.171%) than in ND4 (84.945%), possibly as a result of gene flow and  
461 the inability of mtDNA to detect it. Conversely, variation among individuals within  
462 populations was low for ND4 (8.736%) and high for microsatellite (56.425%) markers,  
463 as expected for polymorphic loci such as microsatellites.

464 In the Pyrenees, microsatellite genetic differentiation followed a ring-like  
465 pattern, being maximal between lineages EPY (orange) and CWPY (pink; at opposite  
466 extremities on PCA axis 2, Fig 4c-d), even though they are geographically proximate in  
467 the central and eastern Pyrenees. To evaluate this hypothesis of ring-shaped isolation  
468 by distance, we correlated genetic distances ( $F_{ST}$  obtained from microsatellites) of  
469 Pyrenean populations to different types of geographic distance. We obtained a weak  
470 isolation by distance pattern between genetic differentiation and Euclidean  
471 geographic distance (Mantel's  $R = 0.185$ ,  $P = 0.002$ ; Fig 6). In contrast, we detected a  
472 strong correlation between genetic differentiation and the geographic distance  
473 suggested by PCA analysis (Fig 4c-d), which assumed no direct gene flow across the  
474 central Pyrenean axis and thus between the two most genetically differentiated  
475 lineages EPY and CWPY (Mantel's  $R = 0.683$ ,  $P = 0.001$ ; Fig 6).

476

477 **Fig 6. Isolation by distance analysis over *Alytes obstetricans/almogavarii***  
478 **population pairs from the Pyrenees.** Isolation by distance was calculated based on  
479 (a) Euclidean geographic distance between all pairs of populations (Mantel's  $R =$

0.185,  $P = 0.002$ ) and (b) corrected geographic distance as suggested by PCA analysis, i.e. following a ring-shaped distribution around the Pyrenean chain (Fig 4; Mantel's  $R = 0.683$ ,  $P = 0.001$ ).

The estimation of effective population sizes conducted in Colony returned, in general, low values (S1 Table). Values ranged from five in the population Laguna de Pájaros (LP) to 160 breeding individuals in the population Lago Ercina (ERC), with a mean  $N_e$  of 43. The lowest values were found in populations from the Guadarrama Mountains ( $N_e$  range = 5–15), while higher values were found in the Pyrenees (eastern Pyrenees: 14–51, central Pyrenees: 68, central-western Pyrenees: 12–84) and Picos de Europa (19–160).

## Demographic history

DIYABC analyses suggested highest support for two different but compatible scenarios of population divergence depending on the genetic markers used (i.e. scenario 2 when using only microsatellites and scenario 5 when combining microsatellites and ND4; Fig 2b, S5 Table). Both scenarios had non-overlapping 95% confidence intervals and type I and II errors for the best supported models were low (S5 Table), indicating high confidence in scenario choice. Model checking confirmed that the best supported scenarios provided a good fit to the observed data (data not



501 shown). Furthermore, the mean mutation rate estimated for ND4 was found to be an  
502 order of magnitude higher than the literature value ( $1.96 \times 10^{-7}$   
503 substitutions/site/year; S6 Table), but still much lower than that estimated for  
504 microsatellites (ranging from  $1.28 \times 10^{-4}$  to  $3.89 \times 10^{-4}$  and from  $4.59 \times 10^{-5}$  to  $3.31 \times$   
505  $10^{-4}$  for analyses conducted using only microsatellites and including both ND4 and  
506 microsatellite markers, respectively).

507 The analysis focused on microsatellites indicated that scenario 2 (the  
508 sequential splitting model based on results from clustering analyses) was the best  
509 supported model (Fig 2b, S5 Table). According to this scenario, the first split led to  
510 the separation of Pyrenean populations from peninsular ones. During the second split  
511 there was the divergence of, on the one hand, central-western and central-eastern  
512 Pyrenean populations, and on the other Picos de Europa and Guadarrama  
513 populations. Finally, populations from the central Pyrenees originated from eastern  
514 Pyrenean populations during the third split. The first split occurred 56 000–28 000  
515 years ago, and the second and third splits 36 800–18 400 and 25 200–12 600 years  
516 ago, respectively (S6 Table). The analysis based on the combination of microsatellites  
517 and ND4, however, suggested that Picos de Europa populations were generated by  
518 admixture of populations from the central-western Pyrenees and Guadarrama  
519 (scenario 5; Fig 2b, S5 Table). Results indicated that the first split occurred 76 200–38  
520 100 years ago, the second split 52 800–26 400 years ago and the admixture event 41  
521 400–20 700 years ago (S6 Table).

522

## 523 Discussion

524       The Iberian Peninsula is an extraordinary model system to assess the multiple  
525 historical vicariance events of species, the so called “refugia within refugia” model,  
526 where mountain ranges have had a significant role [11, 12]. Such processes are  
527 influenced by climatic and topographic conditions as well as through biological  
528 processes between populations, which in turn reflect different and contrasting time  
529 scales, historical and contemporary. To unravel such complex scenarios, a multilocus  
530 approach is expected to reveal contrasting, often discordant findings that underline  
531 intricate evolutionary processes [57]. Several recent studies targeting the Iberian  
532 Peninsula and the Mediterranean biodiversity hotspot have focused on the processes  
533 of niche divergence and admixture following secondary contact (e.g. Chamorro et al.  
534 [58] and Martínez-Freiría et al. [59] with Mediterranean vipers, Antunes et al. [60]  
535 with the fire salamander *Salamandra salamandra*, and Dufresnes et al. [61] with  
536 *Discoglossus* and *Pelodites* frogs), highlighting the role of these areas as centres of  
537 diversification and speciation. The results of the present study revealed a strong  
538 association of the defined genetic lineages with geography by using a multilocus  
539 analysis of genetic divergence in Iberian high mountain populations of *A.*  
540 *obstetricans/almogavarii*. Furthermore, high mountain populations showed higher  
541 levels of genetic distinctiveness than lowland populations (Fig 5), suggesting that

542 mountains may have driven population differentiation through long-term geographic  
543 isolation, with lowlands more likely to be dispersal corridors for *A.*  
544 *obstetricans/almogavarii*, as it has been described for other species (see e.g. [62,  
545 63]).

546

## 547 **The role of high mountains in genetic differentiation and** 548 **glacial refugia**

549 This study describes the presence of seven different nuclear microsatellite  
550 clusters, that are likely a result of recent microrefugial areas within the Pyrenees (Fig  
551 5). Most of the recovered genetic structure was within Pyrenean populations, which  
552 in turn were genetically more related to each other than with the other two high  
553 mountain areas. Putative episodes of admixture within *A. obstetricans/almogavarii* in  
554 the Pyrenees were suggested by previous phylogenetic analyses [3]. Following the  
555 splits between major population lineages in *A. obstetricans/almogavarii*, which date  
556 back to the Early Pleistocene (starting from 2.5 Mya; [20]), there have been several  
557 glacial-interglacial episodes that likely provided opportunities for diverging taxa to  
558 come into contact and interbreed following range shifts tracking the climatic  
559 fluctuations [12, 64]. Our findings show that Pyrenean high mountain populations  
560 have gone through relatively recent events of admixture, likely favoured by the  
561 different glacial-interglacial episodes that characterised the Late Pleistocene.

Specifically, according to ABC analyses, the two lineages ascribed to *A. almogavarii* (E-F, central and eastern Pyrenees), together with some populations of *A. o. obstetricans* (central-western Pyrenean group) seem to have undergone a certain degree of contact and admixture until divergence took place ~36 800–12 600 years ago (Fig 2b). Despite the selected model, which proposes two independent admixture events between the three lineages, the highly overlapping dates together with the significant ring-shaped isolation by distance pattern (Fig 6; see below) suggest that one single admixture event might have occurred within one main glacial refugia where the three lineages coincided. In addition, contemporary signs of connectivity between the two species were detected at lineage borders, as indicated by the occurrence of a contact zone between ND4 lineage E and *A. o. obstetricans* in the west (Figs 3, 5 and S2). Similarly, signs of admixture and extensive gene flow between *A. o. obstetricans* and *A. almogavarii* in the western Pyrenees were previously pointed out by allozyme markers [25, 26]. In contrast, in the central and eastern Pyrenees no signs of connectivity were detected between ND4 lineage F and either lineage E or *A. o. obstetricans*. This scenario of different contact zones telling different stories is exemplified in ring species, i.e. a system formed by a region of interconnected populations with both ends of the ring coming into contact without apparent admixture [65, 66]. In the Pyrenees, the spatial distribution of the *A. obstetricans* complex seems to fit with a postglacial colonisation pattern similar to what has been described in ring diversification, where taxa at the western part of the

583 ring likely interbreed and those at the eastern side apparently don't, displaying a  
584 continuum from slightly divergent neighbouring populations to substantially  
585 reproductively isolated taxa (Figs 4d, 5 and 6). Ring diversifications represent cases of  
586 population divergence around a geographical barrier in a ring-like manner [67] that  
587 can result in cases of speciation in action (i.e. ring species) and have been cited as  
588 evidence of evolution [68], with some of the most well-known cases being identified  
589 in herptiles, such as the *Ensatina eschscholtzii* salamander complex [69] and the  
590 western fence lizard *Sceloporus occidentalis* [70] in western North America. In light of  
591 this, our results are not entirely in line with the distinction of *A. almogavarii* as a  
592 different species, yet support a scenario of speciation in action, with lineage F  
593 showing evidence for speciation and reproductive isolation [23], and lineage E  
594 retaining some degree of connectivity with *A. o. obstetricans*. Nevertheless, we  
595 cannot rule out that this pattern may be the result of geographic sampling gaps, and  
596 additional surveys across hybrid zones between lineages E-F and *A. o. obstetricans*, as  
597 well as further work using resistance distances (i.e. by taking elevation, slope and  
598 land cover into account), would be required to fully test the ring species hypothesis.

599 Finally, with regard to the central-western Pyrenean group, the subdivision by  
600 microsatellite analyses into two or three different genetic clusters (Figs 4 and S2),  
601 points to a scenario of allopatric divergence after the recolonization of the Pyrenees  
602 as a result of geographic barriers, with consequent reduction or disruption of gene  
603 flow. Alternatively, this differentiation might have happened during one of the abrupt

604 cooling episodes of the Holocene (e.g. the 8 200 year-event; [71]), with consequent  
605 isolation in separate glacial refugia. Range isolation and lineage divergence in  
606 separate Pyrenean refugia during Pleistocene glacial cycles were also invoked e.g. for  
607 the Pyrenean brook newt *Calotriton asper* [55], the ground-dwelling spider  
608 *Harpactocrates ravastellus* [72], the rusty-leaved alpenrose *Rhododendron*  
609 *ferrugineum* [73] and the snapdragon *Antirrhinum* [74], in line with evidence from a  
610 number of other high mountain areas that served as glacial refugia during periods of  
611 adverse conditions, such as the Andes, Himalaya and the Southern Alps in New  
612 Zealand (see [64] for a review). From a conservation point of view, we suggest that  
613 these areas should be treated as separate conservation and management units.

614

## 615 **Mito-nuclear discordances**

616 The analyses of microsatellites distinguished two highly divergent *A. o.*  
617 *obstetricans* lineages, one in the central-western Pyrenees and the other in Picos de  
618 Europa (Figs 4 and S2), with the latter being more genetically related to the southern  
619 populations (ascribed to *A. o. pertinax*; Figs 4d and S7). In contrast, these two  
620 lineages bear the same mtDNA (ND4) haplogroup ascribed to *A. o. obstetricans*  
621 (haplogroup B; Figs 3 and S2a). One possible explanation is that the closer genetic  
622 affinity of the western and southern area populations rather than to the central-  
623 western Pyrenean lineage originated from extensive admixture with *A. o.*

624 *obstetricans* (the central-western Pyrenean group) as the maternal donor and *A. o.*  
625 *pertinax* as the paternal donor (Fig 2b). A similar pattern was observed in *S.*  
626 *salamandra* [75] and in crustaceans of the genus *Daphnia* [76]. A plausible scenario  
627 could be that, during Late Pleistocene glacial periods (as suggested by results from  
628 DYABC modelling when combining both microsatellites and mtDNA; Fig 2), some *A. o.*  
629 *obstetricans* populations remained confined in isolated refugia where they coincided  
630 with *A. o. pertinax* for a sufficient time so that genetic admixture could take place.  
631 Similarly, range isolation during Pleistocene climatic fluctuations was suggested for  
632 the cryptic *Pelodytes* anuran clade [77, 78], the Cabrera vole *Microtus cabreræ* [79]  
633 and the scrub-legume grasshopper *Chorthippus binotatus binotatus* [80], where  
634 extant lineages likely diverged in separated refugia within the Iberian Peninsula.  
635 Subdivided glacial refugia could have experienced events of admixture during the  
636 succession of glacial and interglacial periods, with consequent fusion between  
637 refugial lineages [81, 82].

638 Mito-nuclear discordances with evidence for admixture or hybridisation are  
639 not uncommon in amphibians (e.g. [4, 8, 60]) and have also been described in a wide  
640 range of other animal species from north-central Iberian Peninsula, from arachnids  
641 [83] to mammals [84]. Furthermore, the Cantabrian Mountains represent a peculiar  
642 biogeographic region and a recognised hotspot of genetic diversity in amphibians,  
643 being home to endemic refugial clades in a number of species with broad European  
644 distribution [82, 85]. Finally, more recently, the Picos de Europa and *A. o. pertinax*

645 populations may have come into secondary contact and interbred following an  
646 expansion phase, creating zones of admixture at lineage borders. Alternatively, the  
647 discordance may stem from stochastic processes in the form of genetic drift, and the  
648 phylogeographic structure detected in mtDNA (Figs 3 and S3) may have developed as  
649 a result of low individual dispersal distances and/or population sizes [86], as  
650 evidenced by our results and published literature (e.g. [87]). Further studies and  
651 sequencing of more molecular markers are needed to test these hypotheses and  
652 enrich our understanding of the phylogeography of *A. obstetricans*.

653

## 654 **Chytridiomycosis and population bottleneck**

655 The genetic distinctiveness and limited genetic diversity of populations from  
656 the Guadarrama Mountains herein detected (Figs 4 and S2, Table 1) are likely early  
657 signs of inbreeding depression induced by an emerging pathogen, i.e. the chytrid  
658 fungus *Batrachochytrium dendrobatidis* [88]. It should be noted that our sampling  
659 was performed approximately 10 years after an epidemic of the disease  
660 chytridiomycosis, which hugely impacted this area in the period 1997–1999, causing  
661 several populations to decrease or even disappear [16, 89]. Accordingly, the only  
662 sampled population in the affected area that did not show signs of chytridiomycosis  
663 was the one presenting the highest genetic diversity (Montes de Valsain, MV; S1  
664 Table). Our findings complement those of Albert et al. [18] that detected evidence of  
665 low genetic variability and strong population bottleneck in *A. obstetricans* from the



666 same mountain system. In addition to this, we report on the first estimates of  
667 effective population sizes of these populations, which were among the lowest overall  
668 ( $N_e = 5-15$ ; Table 1), raising concern for the long-term persistence of these  
669 populations, which are small and isolated. Indeed, the closest neighbouring  
670 populations are located more than 50 km away and are known to be small and not  
671 genetically related [18, 90]. Furthermore, the Guadarrama Mountains constitute a  
672 major barrier to gene flow in amphibians and a key feature shaping population  
673 structure and promoting population divergence across taxa [62]. Our results are an  
674 example of a disease acting as selective pressure in wild populations by inducing  
675 genetic hallmarks of bottlenecks and inbreeding, as it has also been shown in other  
676 species such as the black-tailed prairie dog (*Cynomys ludovicianus*), the mountain  
677 yellow-legged frog (*Rana muscosa*) and the bobcat (*Lynx rufus*) (reviewed in [91]).  
678

## 679 **Differences in the evolutionary horizon/resolution between** 680 **genetic markers**

681 This study confirms previous findings in *A. obstetricans/almogavarii* clades  
682 [20] with the only difference that our species tree analyses recovered a different  
683 basal lineage (S3 Fig), a likely consequence of our limited inference power given that  
684 only two loci were used for species tree reconstruction. Results from ABC modelling  
685 based on either microsatellites or microsatellites + mtDNA resulted in time estimates

686 highly different from those of the species tree (Fig 2b), suggesting that the two  
 687 analyses are depicting different evolutionary events. In fact, while the species tree  
 688 has proven useful to estimate divergence times associated with the formation of  
 689 species/subspecies, ABC modelling was here employed to gain insights into the  
 690 colonisation of three high mountain regions in the Iberian Peninsula by the different  
 691 *A. obstetricans/almogavarii* taxa. Microsatellite markers, with their faster mutation  
 692 rate, are known to perform poorly for the estimation of ancient historical events [57,  
 693 92]. On the contrary, microsatellites provide substantially better estimations than  
 694 mtDNA for the most recent dynamics [57]. However, the combination of both  
 695 markers in our ABC modelling resulted in similar divergence times as those estimated  
 696 using microsatellites alone. It is thus possible that combining both markers may have  
 697 biased toward microsatellites and the estimation of recent historical events.

698         We need to stress that DIYABC modelling has some uncertainty. Firstly, this  
 699 approach is based on scenarios where no gene flow is permitted between  
 700 populations after they initially diverge. Only single events of admixture between  
 701 populations are considered, whereas recurrent gene flow due to dispersal cannot be  
 702 incorporated. However, population structure analyses were used to investigate  
 703 contemporary gene flow and identify patterns of admixture and contact zones at  
 704 lineage borders (e.g. Fig 5). Secondly, the tested models do not represent a  
 705 comprehensive range of all possible scenarios, but are instead based on a selection of  
 706 contrasting hypotheses that we considered were most likely to reflect our data. We

707 focused our analysis on simple contrasting models aimed at capturing the key  
 708 demographic events, avoiding overcomplex and redundant models, therefore the  
 709 selected models should be viewed as a starting point for evolutionary understanding.  
 710 This approach has proven useful to increase the ability of DIYABC to reveal the  
 711 correct model, as well as to better estimate the error and accuracy of parameter  
 712 estimates [93]. On the other hand, it has to be noted that estimates based on  
 713 mitochondrial data might be unreliable due to the erratic mutation rate of mtDNA  
 714 and to the fact that mtDNA does not evolve neutrally since transmission of  
 715 mitochondria is completely linked to maternal inheritance. Indeed, mtDNA-based  
 716 estimates have been found to mismatch the onset of species divergence in both  
 717 directions due to the stochasticity of coalescence [94].

718

## 719 **Concluding remarks**

720 Our multilocus phylogeography across the Iberian Peninsula revealed high  
 721 genetic structure correlated with geography and a complex pattern of lineage  
 722 admixture in high mountain populations of *A. obstetricans/almogavarii*. Our study  
 723 evidenced how each analysed mountain region underwent a peculiar  
 724 phylogeographic history through the Late Pleistocene, which is consistent with the  
 725 “refugia within refugia” model [11, 12] and confirms previous studies on a number of  
 726 Iberian amphibian species (e.g. [22, 77, 85, 95, 96]). Results also support the  
 727 assumption that refugia within refugia may be hotspots of extensive mito-nuclear

728 discordances [82], highlighting the importance of multilocus approaches to infer the  
 729 dynamics of population divergence. Environmental change in the different mountain  
 730 systems may have an influence on selection, resulting in an increased divergence  
 731 among isolated populations, consequently leading to speciation [97]. The phenetic  
 732 differences between the subspecies of *Alytes* (especially *A. o. pertinax*) may be a  
 733 further indication of adaptation to some micro-environmental differences such as  
 734 streams vs still waters (known to influence coloration in *Alytes*, [98]), temperature  
 735 and solar radiation at different altitudes between the studied mountain systems.

736

## 737 **Acknowledgements**

738 We thank Saioa Fernández-Beaskoetxea, Amparo Mora, Susana Marquínez, Fernando  
 739 Rivada, René A. Priego, Abel Bermejo and Matthew C. Fisher for field assistance, and  
 740 Eva Albert, Laura Méndez, Annie Machordom and Andrés Fernández-Loras for  
 741 laboratory assistance.

## 742 References

- 743 1. Avise JC. Phylogeography: The history and formation of species. (ELS) iEoLS, editor.  
744 Cambridge, MA, USA: Harvard University Press; 2000.
- 745 2. Fordham DA, Brook BW, Moritz C, Nogués-Bravo D. Better forecasts of range  
746 dynamics using genetic data. *Trends in Ecology & Evolution*. 2014;29(8):436-43.
- 747 3. Gonçalves H, Martínez-Solano I, Ferrand N, García-París M. Conflicting phylogenetic  
748 signal of nuclear vs mitochondrial DNA markers in midwife toads (Anura,  
749 Discoglossidae, *Alytes*): Deep coalescence or ancestral hybridization? *Molecular*  
750 *Phylogenetics and Evolution*. 2007;44(1):494-500.
- 751 4. Pereira RJ, Martinez-Solano I, Buckley D. Hybridization during altitudinal range shifts:  
752 Nuclear introgression leads to extensive cyto-nuclear discordance in the fire  
753 salamander. *Molecular Ecology*. 2016;25(7):1551-65.
- 754 5. Denton RD, Kenyon LJ, Greenwald KR, Gibbs HL. Evolutionary basis of mitonuclear  
755 discordance between sister species of mole salamanders (*Ambystoma* sp.). *Molecular*  
756 *Ecology*. 2014;23(11):2811-24.
- 757 6. Edwards SV, Potter S, Schmitt CJ, Bragg JG, Moritz C. Reticulation, divergence, and  
758 the phylogeography–phylogenetics continuum. *Proceedings of the National Academy*  
759 *of Sciences*. 2016;113(29):8025-32.
- 760 7. Toews DPL, Brelsford A. The biogeography of mitochondrial and nuclear discordance  
761 in animals. *Molecular Ecology*. 2012;21(16):3907-30.
- 762 8. Bisconti R, Porretta D, Arduino P, Nascetti G, Canestrelli D. Hybridization and  
763 extensive mitochondrial introgression among fire salamanders in peninsular Italy.  
764 *Scientific Reports*. 2018;8(1):1-10.
- 765 9. Hewitt GM. The genetic legacy of the Quaternary ice ages. *Nature*.  
766 2000;405(6789):907-13.
- 767 10. Hewitt GM. Genetic consequences of climatic oscillations in the Quaternary.  
768 *Philosophical Transactions of the Royal Society of London B: Biological Sciences*.  
769 2004;359(1442):183-95; discussion 95.
- 770 11. Gómez A, Lunt DH. Refugia within refugia: Patterns of phylogeographic concordance  
771 in the Iberian Peninsula. In: Weiss S, Ferrand N, editors. *Phylogeography of southern*  
772 *European refugia*. Amsterdam, Netherlands: Springer; 2007. p. 155-88.
- 773 12. Abellán P, Svenning J-C. Refugia within refugia—patterns in endemism and genetic  
774 divergence are linked to Late Quaternary climate stability in the Iberian Peninsula.  
775 *Biological Journal of the Linnean Society*. 2014;113(1):13-28.
- 776 13. Hewitt GM. Some genetic consequences of ice ages, and their role in divergence and  
777 speciation. *Biological Journal of the Linnean Society*. 1996;58(3):247-76.
- 778 14. Bosch J, Beebee T, Schmidt B, Tejedo M, Martinez Solano I, Salvador A, et al. *Alytes*  
779 *obstetricans* (errata version published in 2016). The IUCN Red List of Threatened  
780 Species 2009: e.T55268A87541047.  
781 doi:10.2305/IUCN.UK.2009.RLTS.T55268A11283700.en. 2009.
- 782 15. Miró A, Sabás I, Ventura M. Large negative effect of non-native trout and minnows  
783 on Pyrenean lake amphibians. *Biological Conservation*. 2018;218:144-53.

- 784 16. Bosch J, Martínez-Solano I, García-París M. Evidence of a chytrid fungus infection  
785 involved in the decline of the common midwife toad (*Alytes obstetricans*) in  
786 protected areas of central Spain. *Biological Conservation*. 2001;97(3):331-7.
- 787 17. Tobler U, Schmidt BR. Within- and among-population variation in chytridiomycosis-  
788 induced mortality in the toad *Alytes obstetricans*. *PLoS One*. 2010;5(6):e10927.
- 789 18. Albert EM, Fernández-Beaskoetxea S, Godoy JA, Tobler U, Schmidt BR, Bosch J.  
790 Genetic management of an amphibian population after a chytridiomycosis outbreak.  
791 *Conservation Genetics*. 2014;16(1):103-11.
- 792 19. Walker SF, Bosch J, Gomez V, Garner TW, Cunningham AA, Schmeller DS, et al.  
793 Factors driving pathogenicity vs. prevalence of amphibian panzootic chytridiomycosis  
794 in Iberia. *Ecology Letters*. 2010;13(3):372-82.
- 795 20. Gonçalves H, Maia-Carvalho B, Sousa-Neves T, Garcia-Paris M, Sequeira F, Ferrand N,  
796 et al. Multilocus phylogeography of the common midwife toad, *Alytes obstetricans*  
797 (Anura, Alytidae): Contrasting patterns of lineage diversification and genetic  
798 structure in the Iberian refugium. *Molecular Phylogenetics and Evolution*.  
799 2015;93:363-79.
- 800 21. Maia-Carvalho B, Gonçalves H, Martínez-Solano I, Gutiérrez-Rodríguez J, Lopes S,  
801 Ferrand N, et al. Intraspecific genetic variation in the common midwife toad (*Alytes*  
802 *obstetricans*): Subspecies assignment using mitochondrial and microsatellite markers.  
803 *Journal of Zoological Systematics and Evolutionary Research*. 2014;52(2):170-5.
- 804 22. Maia-Carvalho B, Vale CG, Sequeira F, Ferrand N, Martínez-Solano I, Gonçalves H. The  
805 roles of allopatric fragmentation and niche divergence in intraspecific lineage  
806 diversification in the common midwife toad (*Alytes obstetricans*). *Journal of*  
807 *Biogeography*. 2018;45(9):2146-58.
- 808 23. Dufresnes C, Martínez-Solano I. Hybrid zone genomics supports candidate species in  
809 Iberian *Alytes obstetricans*. *Amphibia-Reptilia*. 2019;41(1):105-12.
- 810 24. Dufresnes C, Hernandez A. Phylogeographic advances in midwife toads (*Alytes*)  
811 support the existence of a novel taxon endemic to the Central Pyrenees. *Journal of*  
812 *Zoological Systematics Evolutionary Research*. 2021;59(8):2170-9.
- 813 25. Arntzen JW, Garcia-Paris M. Morphological and allozyme studies of midwife toads  
814 (genus *Alytes*), including the description of two new taxa from Spain. *Contributions*  
815 *to Zoology*. 1995;65(1):5-34.
- 816 26. García-París M. Variabilidad genética y distribución geográfica de *Alytes obstetricans*  
817 *almogavarii* en España. *Revista Española de Herpetología*. 1995;9:133-8.
- 818 27. Pöschel J, Heltai B, Graciá E, Quintana MF, Velo-Antón G, Arribas O, et al. Complex  
819 hybridization patterns in European pond turtles (*Emys orbicularis*) in the Pyrenean  
820 Region. *Scientific Reports*. 2018;8(1):1-13.
- 821 28. Montero-Pau J, Gómez A, Muñoz J. Application of an inexpensive and high-  
822 throughput genomic DNA extraction method for the molecular ecology of  
823 zooplanktonic diapausing eggs. *Limnology and Oceanography: Methods*.  
824 2008;6(6):218-22.
- 825 29. Kumar S, Stecher G, Tamura K. MEGA7: Molecular Evolutionary Genetics Analysis  
826 version 7.0 for bigger datasets. *Molecular Biology and Evolution*. 2016;33(7):1870-4.
- 827 30. Flot JF. SeqPHASE: a web tool for interconverting PHASE input/output files and FASTA  
828 sequence alignments. *Molecular Ecology Resources*. 2010;10(1):162-6.

- 829 31. Stephens M, Donnelly P. A comparison of bayesian methods for haplotype  
830 reconstruction from population genotype data. *The American Journal of Human*  
831 *Genetics*. 2003;73(5):1162-9.
- 832 32. Stephens M, Smith NJ, Donnelly P. A new statistical method for haplotype  
833 reconstruction from population data. *The American Journal of Human Genetics*.  
834 2001;68(4):978-89.
- 835 33. Kearse M, Moir R, Wilson A, Stones-Havas S, Cheung M, Sturrock S, et al. Geneious  
836 Basic: An integrated and extendable desktop software platform for the organization  
837 and analysis of sequence data. *Bioinformatics*. 2012;28(12):1647-9.
- 838 34. Van Oosterhout C, Hutchinson WF, Wills DPM, Shipley P. MICRO-CHECKER: Software  
839 for identifying and correcting genotyping errors in microsatellite data. *Molecular*  
840 *Ecology Notes*. 2004;4(3):535-8.
- 841 35. Rousset F. GENEPOP'007: a complete re-implementation of the GENEPOP software  
842 for Windows and Linux. *Molecular Ecology Resources*. 2008;8(1):103-6.
- 843 36. Rice WR. Analyzing tables of statistical tests. *Evolution*. 1989;43(1):223-5.
- 844 37. Peakall R, Smouse P. GenAlEx 6.5: Genetic analysis in Excel. Population genetic  
845 software for teaching and research-an update. *Bioinformatics*. 2012;28(19):2537-9.
- 846 38. Kalinowski ST. hp-rare 1.0: a computer program for performing rarefaction on  
847 measures of allelic richness. *Molecular Ecology Notes*. 2005;5(1):187-9.
- 848 39. Belkhir K, Borsa P, Chikhi L, Raufaste N, Bonhomme F. GENETIX 4.05, logiciel sous  
849 Windows TM pour la génétique des populations. Laboratoire Génome, Populations,  
850 Interactions, CNRS UMR 5000, Université de Montpellier II, Montpellier (France).  
851 1996-2004.
- 852 40. Salzburger W, Ewing GB, Von Haeseler A. The performance of phylogenetic  
853 algorithms in estimating haplotype genealogies with migration. *Molecular Ecology*.  
854 2011;20(9):1952-63.
- 855 41. Darriba D, Taboada GL, Doallo R, Posada D. jModelTest 2: More models, new  
856 heuristics and parallel computing. *Nature Methods*. 2012;9(8):772.
- 857 42. Stamatakis A. RAxML-VI-HPC: maximum likelihood-based phylogenetic analyses with  
858 thousands of taxa and mixed models. *Bioinformatics*. 2006;22(21):2688-90.
- 859 43. Rozas J, Ferrer-Mata A, Sánchez-DelBarrio JC, Guirao-Rico S, Librado P, Ramos-Onsins  
860 SE, et al. DnaSP 6: DNA sequence polymorphism analysis of large data sets. *Molecular*  
861 *Biology and Evolution*. 2017;34(12):3299-302.
- 862 44. Heled J, Drummond AJ. Bayesian inference of species trees from multilocus data.  
863 *Molecular Biology and Evolution*. 2009;27(3):570-80.
- 864 45. Drummond AJ, Rambaut A. BEAST: Bayesian evolutionary analysis by sampling trees.  
865 *BMC Evolutionary Biology*. 2007;7(1):1-8.
- 866 46. Jombart T, Devillard S, Balloux F. Discriminant analysis of principal components: A  
867 new method for the analysis of genetically structured populations. *BMC Genetics*.  
868 2010;11(1):94.
- 869 47. R Core Team. R: A language and environment for statistical computing. Vienna,  
870 Austria: R Foundation for Statistical Computing. <http://www.R-project.org/>. 2018.
- 871 48. Pritchard JK, Stephens M, Donnelly P. Inference of population structure using  
872 multilocus genotype data. *Genetics*. 2000;155(2):945-59.



- 873 49. Takezaki N, Nei M, Tamura K. POPTREEW: web version of POPTREE for constructing  
874 population trees from allele frequency data and computing some other quantities.  
875 Molecular Biology and Evolution. 2014;31(6):1622-4.
- 876 50. Caye K, Jay F, Michel O, François O. Fast inference of individual admixture  
877 coefficients using geographic data. The Annals of Applied Statistics. 2018;12(1):586-  
878 608.
- 879 51. Excoffier L, Lischer HE. Arlequin suite ver 3.5: a new series of programs to perform  
880 population genetics analyses under Linux and Windows. Molecular Ecology  
881 Resources. 2010;10(3):564-7.
- 882 52. Excoffier L, Smouse PE, Quattro JM. Analysis of molecular variance inferred from  
883 metric distances among DNA haplotypes: Application to human mitochondrial DNA  
884 restriction data. Genetics. 1992;131(2):479-91.
- 885 53. Dufresnes C, Litvinchuk SN, Leuenberger J, Ghali K, Zinenko O, Stöck M, et al.  
886 Evolutionary melting pots: a biodiversity hotspot shaped by ring diversifications  
887 around the Black Sea in the Eastern tree frog (*Hyla orientalis*). Molecular Ecology.  
888 2016;25(17):4285-300.
- 889 54. Jones OR, Wang J. COLONY: A program for parentage and sibship inference from  
890 multilocus genotype data. Molecular Ecology Resources. 2010;10(3):551-5.
- 891 55. Lucati F, Poignet M, Miró A, Trochet A, Aubret F, Barthe L, et al. Multiple glacial  
892 refugia and contemporary dispersal shape the genetic structure of an endemic  
893 amphibian from the Pyrenees. Molecular Ecology. 2020;29(15):2904-21.
- 894 56. Cornuet JM, Pudlo P, Veyssier J, Dehne-Garcia A, Gautier M, Leblois R, et al. DIYABC  
895 v2.0: A software to make approximate Bayesian computation inferences about  
896 population history using single nucleotide polymorphism, DNA sequence and  
897 microsatellite data. Bioinformatics. 2014;30(8):1187-9.
- 898 57. Emerson BC, Hewitt GM. Phylogeography. Current Biology. 2005;15(10):R367-R71.
- 899 58. Chamorro D, Martínez-Freiría F, Real R, Muñoz AR. Understanding parapatry: How do  
900 environment and competitive interactions shape Iberian vipers' distributions?  
901 Journal of Biogeography. 2020.
- 902 59. Martínez-Freiría F, Freitas I, Zuffi MA, Golay P, Ursenbacher S, Velo-Antón G. Climatic  
903 refugia boosted allopatric diversification in western Mediterranean vipers. Journal of  
904 Biogeography. 2020;47(8):1698-713.
- 905 60. Antunes B, Velo-Antón G, Buckley D, Pereira R, Martínez-Solano I. Physical and  
906 ecological isolation contribute to maintain genetic differentiation between fire  
907 salamander subspecies. Heredity. 2021:1-14.
- 908 61. Dufresnes C, Pribille M, Alard B, Gonçalves H, Amat F, Crochet P-A, et al. Integrating  
909 hybrid zone analyses in species delimitation: Lessons from two anuran radiations of  
910 the Western Mediterranean. Heredity. 2020;124(3):423-38.
- 911 62. Sánchez-Montes G, Wang J, Ariño AH, Martínez-Solano I. Mountains as barriers to  
912 gene flow in amphibians: Quantifying the differential effect of a major mountain  
913 ridge on the genetic structure of four sympatric species with different life history  
914 traits. Journal of Biogeography. 2018;45(2):318-31.
- 915 63. Li Y, Zhang X, Fang Y. Landscape features and climatic forces shape the genetic  
916 structure and evolutionary history of an oak species (*Quercus chenii*) in East China.  
917 Frontiers in Plant Science. 2019;10:1060.



- 918 64. Wallis GP, Waters JM, Upton P, Craw D. Transverse alpine speciation driven by  
919 glaciation. *Trends in Ecology & Evolution*. 2016;31(12):916-26.
- 920 65. Alcaide M, Scordato ES, Price TD, Irwin DE. Genomic divergence in a ring species  
921 complex. *Nature*. 2014;511(7507):83-5.
- 922 66. Irwin D, Wake D. Ring species. In: Kliman RM, editor. *Encyclopedia of evolutionary*  
923 *biology*. 3. Oxford: Academic Press; 2016. p. 467–75.
- 924 67. Monahan WB, Pereira RJ, Wake DB. Ring distributions leading to species formation: a  
925 global topographic analysis of geographic barriers associated with ring species. *BMC*  
926 *Biology*. 2012;10(1):1-15.
- 927 68. Irwin DE, Irwin JH, Price TD. Ring species as bridges between microevolution and  
928 speciation. *Genetica*. 2001;112-113:223-43.
- 929 69. Kuchta SR, Wake DB. Wherefore and whither the ring species? 2016;104(1):189-201.
- 930 70. Bouzid NM, Archie JW, Anderson RA, Grummer JA, Leaché AD. Evidence for  
931 ephemeral ring species formation during the diversification history of western fence  
932 lizards (*Sceloporus occidentalis*). *Molecular Ecology*. 2021.
- 933 71. Alley RB, Mayewski PA, Sowers T, Stuiver M, Taylor KC, Clark PU. Holocene climatic  
934 instability: A prominent, widespread event 8200 yr ago. *Geology*. 1997;25(6):483-6.
- 935 72. Bidegaray-Batista L, Sánchez-Gracia A, Santulli G, Maiorano L, Guisan A, Vogler AP, et  
936 al. Imprints of multiple glacial refugia in the Pyrenees revealed by phylogeography  
937 and palaeodistribution modelling of an endemic spider. *Molecular Ecology*.  
938 2016;25(9):2046-64.
- 939 73. Charrier O, Dupont P, Pornon A, Escaravage N. Microsatellite marker analysis reveals  
940 the complex phylogeographic history of *Rhododendron ferrugineum* (Ericaceae) in  
941 the Pyrenees. *PLoS One*. 2014;9(3):e92976.
- 942 74. Liberal IM, Burrus M, Suchet C, Thebaud C, Vargas P. The evolutionary history of  
943 *Antirrhinum* in the Pyrenees inferred from phylogeographic analyses. *BMC*  
944 *Evolutionary Biology*. 2014;14(1):146.
- 945 75. Donaire-Barroso D, Rivera X. La salamandra común *Salamandra salamandra*  
946 (Linnaeus, 1758) en el subcantábrico: Origen, dispersión, subespecies y zonas de  
947 introgresión. *Butlletí Societat Catalana de Herpetologia*. 2016;23:7-38.
- 948 76. Thielsch A, Knell A, Mohammadyari A, Petrusek A, Schwenk K. Divergent clades or  
949 cryptic species? Mito-nuclear discordance in a *Daphnia* species complex. *BMC*  
950 *Evolutionary Biology*. 2017;17(1):227.
- 951 77. Díaz-Rodríguez J, Gehara M, Marquez R, Vences M, Goncalves H, Sequeira F, et al.  
952 Integration of molecular, bioacoustical and morphological data reveals two new  
953 cryptic species of *Pelodytes* (Anura, Pelodytidae) from the Iberian Peninsula. *Zootaxa*.  
954 2017;4243(1):1-41.
- 955 78. Díaz-Rodríguez J, Gonçalves H, Sequeira F, Sousa-Neves T, Tejedo M, Ferrand N, et al.  
956 Molecular evidence for cryptic candidate species in Iberian *Pelodytes* (Anura,  
957 Pelodytidae). *Molecular Phylogenetics and Evolution*. 2015;83:224-41.
- 958 79. Barbosa S, Pauperio J, Herman JS, Ferreira CM, Pita R, Vale-Goncalves HM, et al.  
959 Endemic species may have complex histories: within-refugium phylogeography of an  
960 endangered Iberian vole. *Molecular Ecology*. 2017;26(3):951-67.

- 961 80. Noguerales V, Cordero PJ, Ortego J. Inferring the demographic history of an  
962 oligophagous grasshopper: Effects of climatic niche stability and host-plant  
963 distribution. *Mol Phylogenet Evol.* 2018;118:343-56.
- 964 81. Canestrelli D, Bisconti R, Sacco F, Nascetti G. What triggers the rising of an  
965 intraspecific biodiversity hotspot? Hints from the agile frog. *Scientific Reports.*  
966 2014;4:5042.
- 967 82. Dufresnes C, Nicieza AG, Litvinchuk SN, Rodrigues N, Jeffries DL, Vences M, et al. Are  
968 glacial refugia hotspots of speciation and cyto-nuclear discordances? Answers from  
969 the genomic phylogeography of Spanish common frogs. *Molecular Ecology.*  
970 2020;29:986-1000.
- 971 83. Domènech M, Crespo LC, Enguádanos A, Arnedo MA. Mitochondrial discordance in  
972 closely related *Theridion* spiders (Araneae, Theridiidae), with description of a new  
973 species of the *T. melanurum* group. *Zoosystematics Evolution.* 2020;96:159.
- 974 84. Escoda L, Castresana J. The genome of the Pyrenean desman and the effects of  
975 bottlenecks and inbreeding on the genomic landscape of an endangered species.  
976 *Evolutionary Applications.* 2021.
- 977 85. Recuero E, Garcia-Paris M. Evolutionary history of *Lissotriton helveticus*: Multilocus  
978 assessment of ancestral vs. recent colonization of the Iberian Peninsula. *Molecular*  
979 *Phylogenetics and Evolution.* 2011;60(1):170-82.
- 980 86. Irwin DE. Phylogeographic breaks without geographic barriers to gene flow.  
981 *Evolution.* 2002;56(12):2383-94.
- 982 87. Godet C, Clauzel C. Comparison of landscape graph modelling methods for analysing  
983 pond network connectivity. *Landscape Ecology.* 2021;36(3):735-48.
- 984 88. O'Hanlon SJ, Rieux A, Farrer RA, Rosa GM, Waldman B, Bataille A, et al. Recent Asian  
985 origin of chytrid fungi causing global amphibian declines. *Science.*  
986 2018;360(6389):621-7.
- 987 89. Bosch J, Fernández-Beaskoetxea S, Garner TW, Carrascal LM. Long-term monitoring  
988 of an amphibian community after a climate change- and infectious disease-driven  
989 species extirpation. *Global Change Biology.* 2018;24(6):2622-32.
- 990 90. Bosch J. Sapo partero común (*Alytes obstetricans*). In: Pleguezuelos JM, Márquez R,  
991 Lizana M, editors. *Atlas y libro rojo de los anfibios y reptiles de España.* Madrid,  
992 Spain: Dirección General de Conservación de la Naturaleza-Asociación Herpetologica  
993 Española; 2002. p. 82–4.
- 994 91. McKnight DT, Schwarzkopf L, Alford RA, Bower DS, Zenger KR. Effects of emerging  
995 infectious diseases on host population genetics: a review. *Conservation Genetics.*  
996 2017;18(6):1235-45.
- 997 92. Cornuet JM, Ravigne V, Estoup A. Inference on population history and model  
998 checking using DNA sequence and microsatellite data with the software DIYABC  
999 (v1.0). *BMC Bioinformatics.* 2010;11:401.
- 1000 93. Cabrera AA, Palsbøll PJ. Inferring past demographic changes from contemporary  
1001 genetic data: A simulation-based evaluation of the ABC methods implemented in  
1002 DIYABC. *Molecular Ecology Resources.* 2017;17(6):e94-e110.
- 1003 94. Ebdon S, Laetsch DR, Dapporto L, Hayward A, Ritchie MG, Dincă V, et al. The  
1004 Pleistocene species pump past its prime: Evidence from European butterfly sister  
1005 species. *bioRxiv.* 2021.

1006 95. Vences M, Hauswaldt JS, Steinfartz S, Rupp O, Goesmann A, Künzel S, et al. Radically  
1007 different phylogeographies and patterns of genetic variation in two European brown  
1008 frogs, genus *Rana*. Molecular Phylogenetics and Evolution. 2013;68(3):657-70.  
1009 96. Vences M, Sarasola-Puente V, Sanchez E, Amat F, Hauswaldt JS. Diversity and  
1010 distribution of deep mitochondrial lineages of the common frog, *Rana temporaria*, in  
1011 northern Spain. Salamandra. 2017;53:25-33.  
1012 97. Uy JAC, Borgia G. Sexual selection drives rapid divergence in bowerbird display traits.  
1013 Evolution. 2000;54(1):273-8.  
1014 98. Polo-Cavia N, Oliveira JM, Villa AJR, Márquez R. Background colour matching in a wild  
1015 population of *Alytes obstetricans*. Amphibia-Reptilia. 2016;37(3):253-60.  
1016 99. Evanno G, Regnaut S, Goudet J. Detecting the number of clusters of individuals using  
1017 the software STRUCTURE: A simulation study. Molecular Ecology. 2005;14(8):2611-  
1018 20.  
1019

## 1020 **Supporting information**

1021 **S1 Fig. Summary of *A. obstetricans/almogavarii* samples incorporated into each**  
 1022 **main analysis.** (a) Geographic location of populations included in each analysis. For  
 1023 population codes see Fig 1. The inset map shows the distribution of the main  
 1024 lineages: orange - ND4 haplogroups E-F (*A. almogavarii*), yellow - ND4 haplogroup B  
 1025 (*A. o. obstetricans*), blue - ND4 haplogroup A (*A. o. pertinax*), red - ND4 haplogroup C  
 1026 (*A. o. boscai*), green - ND4 haplogroup D (*A. o. boscai*), black - unclear (adapted from  
 1027 Dufresnes and Martínez-Solano [23]). (b) Markers used in each analysis, with the  
 1028 corresponding number of samples and populations. Effective population sizes were  
 1029 calculated only for populations with  $\geq 15$  genotyped individuals. In the case of  
 1030 demographic history, only high mountain populations were included in the analysis.

1031

1032 **S2 Fig. Results of phylogenetic and clustering analyses for *Alytes***  
 1033 ***obstetricans/almogavarii*.** (a) Geographic distribution of the four mtDNA (ND4)  
 1034 haplogroups recovered in the analysis (blue: mtDNA haplogroup A, yellow: mtDNA  
 1035 haplogroup B, grey: mtDNA haplogroup E, orange: mtDNA haplogroup F). In four  
 1036 populations (T2, 61XR, BP and PI) we detected the presence of more than one  
 1037 haplogroup. (b) Results from Discriminant Analysis of Principal Components (DAPC)  
 1038 and (c) STRUCTURE for  $K = 7$  microsatellite groups (see Fig 4). (d) Geographic  
 1039 distribution of the five genetic groups identified by microsatellite-based neighbour-

1040 joining analysis (see S7 Fig). White circles indicate populations with no data available  
1041 for either ND4 or microsatellites. For population codes see Fig 1. The inset map  
1042 shows the distribution of the main lineages: orange - ND4 haplogroups E-F (*A.*  
1043 *almogavarii*), yellow - ND4 haplogroup B (*A. o. obstetricans*), blue - ND4 haplogroup A  
1044 (*A. o. pertinax*), red - ND4 haplogroup C (*A. o. boscai*), green - ND4 haplogroup D (*A.*  
1045 *o. boscai*), black - unclear (adapted from Dufresnes and Martínez-Solano [23]).

1046

1047 **S3 Fig. *Alytes* species tree produced in \*BEAST based on one nuclear gene ( $\beta$ -**  
1048 **fibint7) and four mitochondrial fragments (ND4, cyt-b, 12S and 16S).** Labels on  
1049 branch tips correspond to the distinct ND4 haplogroups identified (blue: mtDNA  
1050 haplogroup A, pink: mtDNA haplogroup B (central-western Pyrenean populations),  
1051 yellow: mtDNA haplogroup B (Picos de Europa populations), grey: mtDNA haplogroup  
1052 E, orange: mtDNA haplogroup F). Posterior probabilities of lineage divergence are  
1053 indicated on branch labels.

1054

1055 **S4 Fig. Resulting plots from Discriminant Analysis of Principal Components (DAPC)**  
1056 **across all *Alytes obstetricans/almogavarii* populations.** (a) Summary plots for K = 2-7  
1057 genetic clusters. At K = 2, genetic clusters are represented as density curves. At K = 3-  
1058 7, dots represent individuals and genetic clusters are shown as inertia ellipses.  
1059 Legend labels indicate the different genetic clusters: eastern Pyrenees (EPY, orange),  
1060 central Pyrenees (CPY, grey), central-western Pyrenees (CWPY, pink), Picos de Europa

1061 mountains (PEU, yellow), and Guadarrama Mountain Range (GUA, blue). (b)  
1062 Distribution of BIC (Bayesian Information Criterion) values according to the number  
1063 of clusters. The red arrow indicates the number of clusters chosen for DAPC analysis.  
1064 The optimal number of clusters was assessed using the *find.clusters* function and  
1065 determined as the K value above which BIC (Bayesian Information Criterion) values  
1066 decreased substantially.

1067

1068 **S5 Fig. Results of Bayesian clustering analyses in STRUCTURE for microsatellites.** (a)  
1069 Mean ( $\pm$  SD) log probability of the data [ $\ln \Pr(X|K)$ ] over 10 runs, for each value of K.  
1070 (b)  $\Delta K$  values as a function of K, calculated according to Evanno et al. [99].

1071

1072 **S6 Fig. Results of Tess3R analyses for microsatellites.** (a) Map depicting the  
1073 distribution of ancestry coefficients inferred through Tess3R for K = 7 clusters. Black  
1074 dots indicate the populations analysed. Colour codes as for STRUCTURE results. More  
1075 saturated colours indicate a greater proportion of ancestry to either cluster. (b)  
1076 Distribution of cross-validation scores according to the number of clusters. The red  
1077 arrow indicates the number of clusters chosen for Tess3R analysis.

1078

1079 **S7 Fig. Neighbour-joining tree based on  $D_A$  distances for microsatellite markers.**  
1080 Branch colours delineate the seven genetic clusters inferred by STRUCTURE (see Figs  
1081 4a and 5), while colour shades around population codes correspond to the distinct

1082 mtDNA (ND4) haplogroups (blue: mtDNA haplogroup A, yellow: mtDNA haplogroup  
1083 B, grey: mtDNA haplogroup E, orange: mtDNA haplogroup F; see Fig 3). In four  
1084 populations (T2, 61XR, BP and PI) we detected the presence of more than one  
1085 haplogroup. For population codes see S1 Table.

1086

1087 **S1 Table. Geographic information and standard genetic statistics of *Alytes***

1088 ***obstetricans/almogavarii* sampling localities.** Populations are grouped according to  
1089 the genetic group of interest (EPY: eastern Pyrenees, CPY: central Pyrenees, CWPY:  
1090 central-western Pyrenees, PEU: Picos de Europa mountains, GUA: Guadarrama  
1091 Mountain Range). Lat. – latitude, Long. – longitude, Alt. – altitude in meters, N –  
1092 sample size for microsatellites, Na – mean number of alleles, Ar – allelic richness  
1093 standardized for sample size, Ho – observed heterozygosity, He – expected  
1094 heterozygosity, Fis – inbreeding coefficient, Ne – effective population size, N ND4 –  
1095 sample size for ND4, ND4 haps – occurrence and code (in parentheses) of  
1096 mitochondrial ND4 haplogroups identified in each population (see Fig 3), N cyt-b –  
1097 sample size for cyt-b, N 12S – sample size for 12S, N 16S – sample size for 16S, N  $\beta$ -  
1098 fibint7 – sample size for  $\beta$ -fibint7.

1099

1100 **S2 Table. Parameters used in DIYABC analysis and respective priors for the best**

1101 **supported scenarios.** The best supported scenarios were scenario 2 when

1102 considering only microsatellites (simple sequence repeats – SSRs) and scenario 5

1103 when including both mtDNA (ND4) and microsatellite markers. See Fig 2 for more  
 1104 information on tested scenarios.  $N$  – effective population size for each analysed  
 1105 deme (EPY – eastern Pyrenees; CPY – central Pyrenees; CWPY – central-western  
 1106 Pyrenees; PEU – Picos de Europa Mountains, GUA – Guadarrama Mountains),  $ra$  –  
 1107 admixture rate,  $t$  – time of events in generations ( $t_1$  – time to the most recent split;  $t_2$   
 1108 – time to the intermediate split;  $t_3$  – time to the most ancient split). Microsatellite  
 1109 (SSRs) and mitochondrial (ND4) parameters: mean  $\mu$  – mean mutation rate, individual  
 1110 locus  $\mu$  – individual locus mutation rate, mean  $P$  – mean coefficient  $P$ , individual locus  
 1111  $P$  – individual locus coefficient  $P$ , SNI – Single Nucleotide Insertion rate, mean  $k$  –  
 1112 mean coefficient  $k$ , individual locus  $k$  – individual locus coefficient  $k$ . Microsatellite  
 1113 loci were divided in two groups depending on the motif length (tri- and  
 1114 tetranucleotide loci). Conditions: sequence data were simulated under a Tamura Nei  
 1115 (TN93) mutation model.

1116

1117 **S3 Table. Microsatellite-based (below diagonal) and ND4-based (above diagonal)**  
 1118 **pairwise estimates of  $F_{ST}$  between the seven genetic groups identified by**  
 1119 **STRUCTURE in *Alytes obstetricans/almogavarii* (see Fig 5). All P values < 0.01.**

1120

1121 **S4 Table. Analysis of molecular variance (AMOVA) for mitochondrial (ND4) and**  
 1122 **nuclear (microsatellites) markers based on the seven genetic groups identified by**  
 1123 **STRUCTURE in *Alytes obstetricans/almogavarii* (see Fig 5). All P values < 0.001.**



1124

1125 **S5 Table. Posterior probability of tested scenarios and 95% confidence intervals (CI)**  
 1126 **estimated with DIYABC analysis when considering only microsatellites and when**  
 1127 **including both mtDNA (ND4) and microsatellite markers.** Type I and II errors for the  
 1128 best supported scenarios are indicated. See Fig 2 for more information on tested  
 1129 scenarios.

1130

1131 **S6 Table. Posterior parameters (median and 95% confidence intervals) and**  
 1132 **RMedAD (Relative Median Absolute Deviation) estimated with DIYABC analysis for**  
 1133 **the best supported scenarios when considering only microsatellites (simple**  
 1134 **sequence repeats – SSRs; scenario 2) and when including both mtDNA (ND4) and**  
 1135 **microsatellite markers (scenario 5).** See Fig 2 for more information on tested  
 1136 scenarios. N – effective population size for each analysed deme (EPY – eastern  
 1137 Pyrenees; CPY – central Pyrenees; CWPY – central-western Pyrenees; PEU – Picos de  
 1138 Europa Mountains; GUA – Guadarrama Mountains), ra – admixture rate, t – time of  
 1139 events in generations ( $t_1$  – time to the most recent split;  $t_2$  – time to the intermediate  
 1140 split;  $t_3$  – time to the most ancient split), mean  $\mu$  – mean mutation rate, mean  $P$  –  
 1141 mean coefficient  $P$ , mean  $k$  – mean coefficient  $k$ ,  $Q_{2.5}$  – quantile 2.5%,  $Q_{97.5}$  – quantile  
 1142 97.5%.

1143

1144 **S1 Appendix. Supporting methods.**

Fig 1

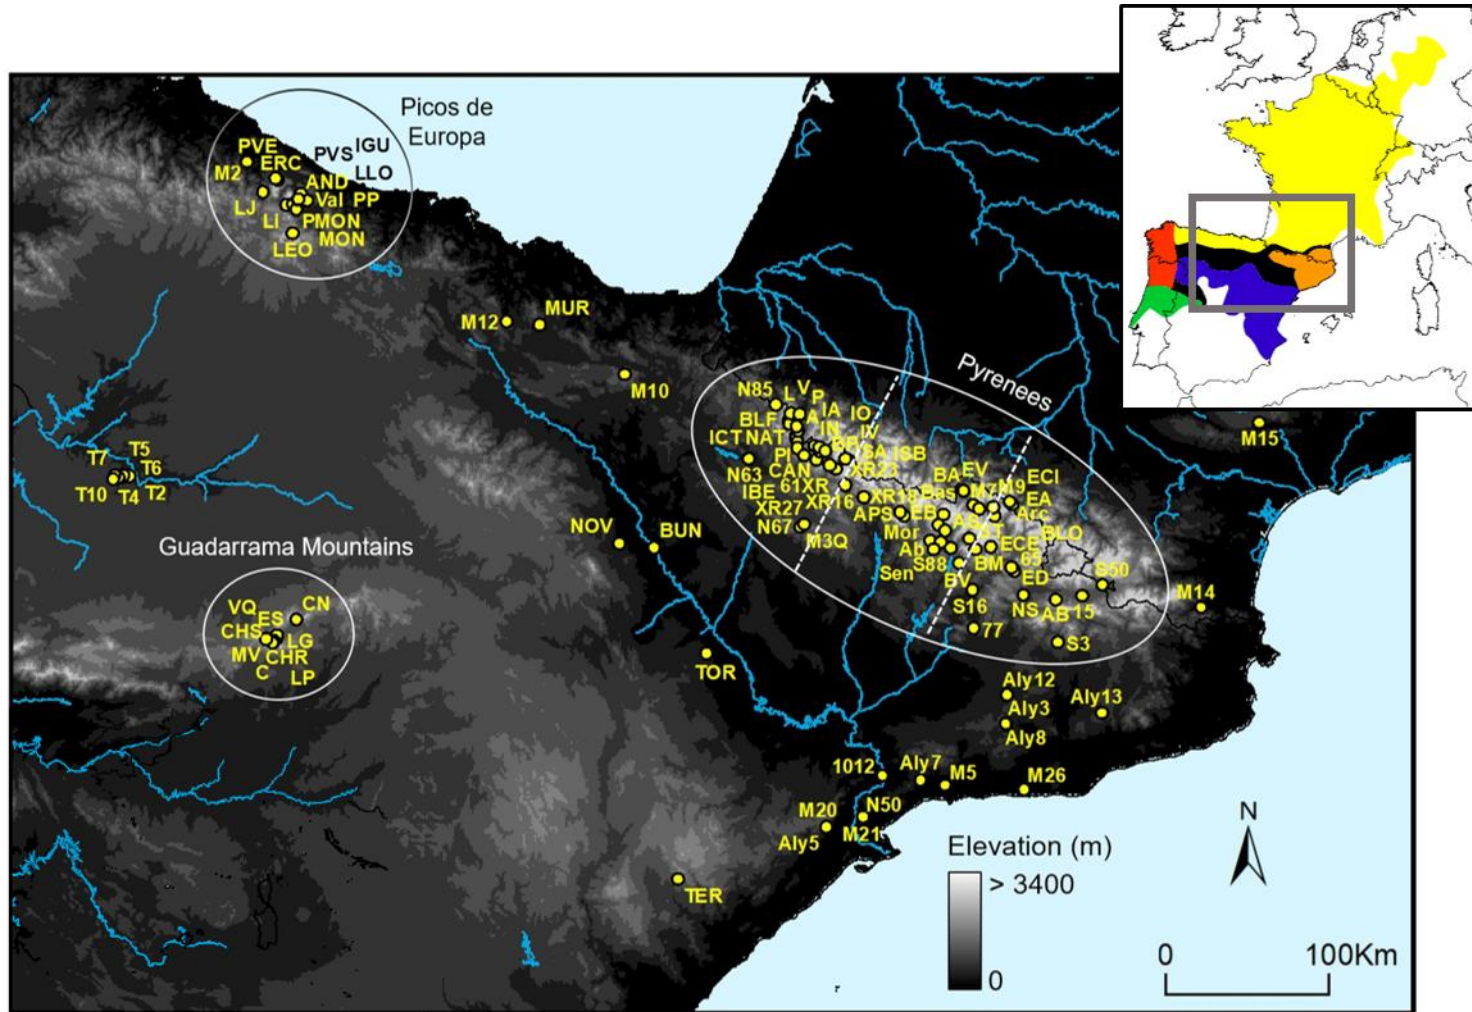

Fig 2

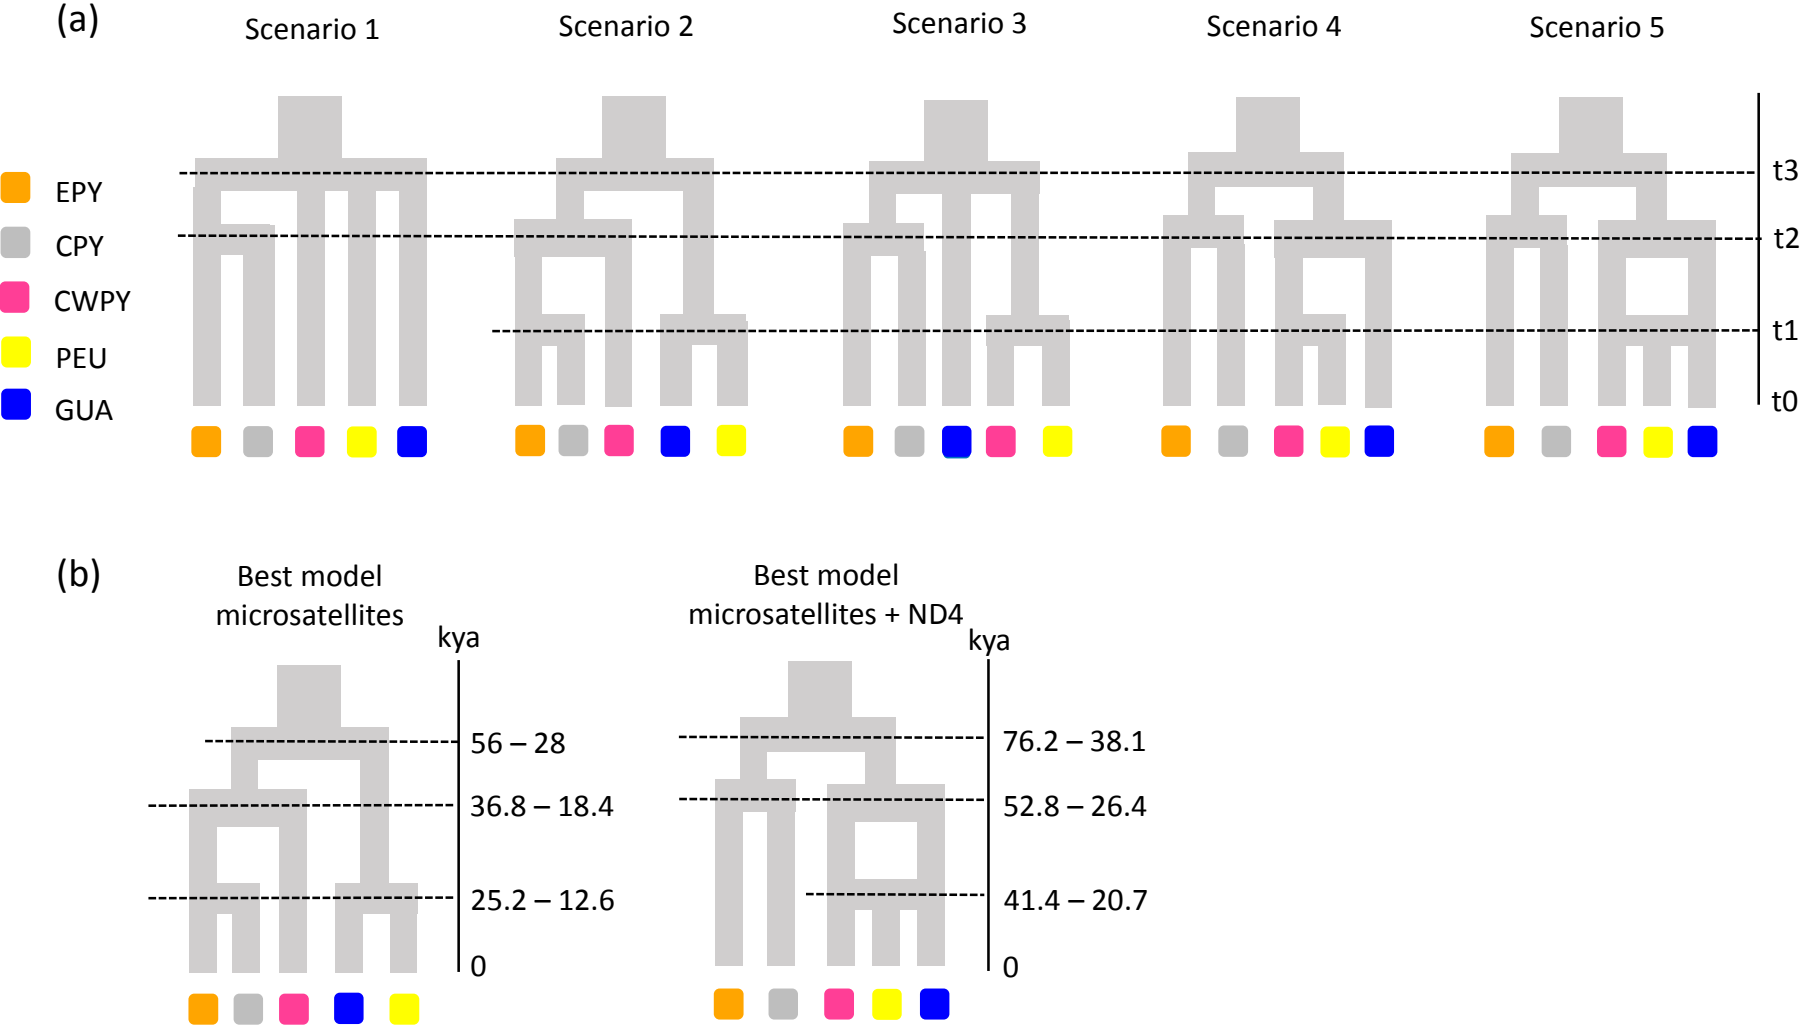

Fig 3

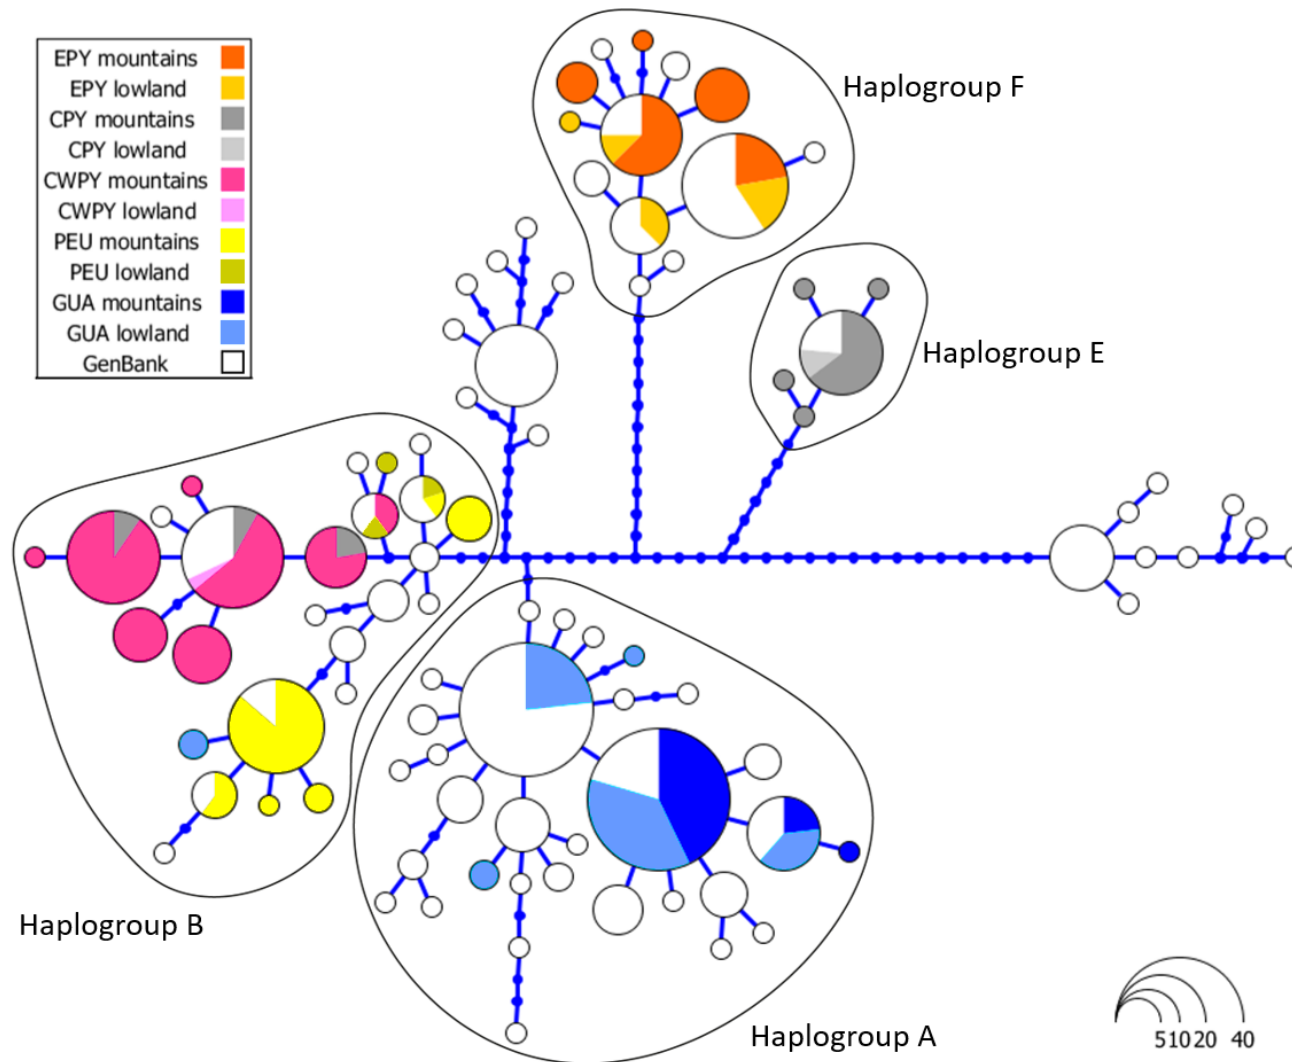

Fig 4

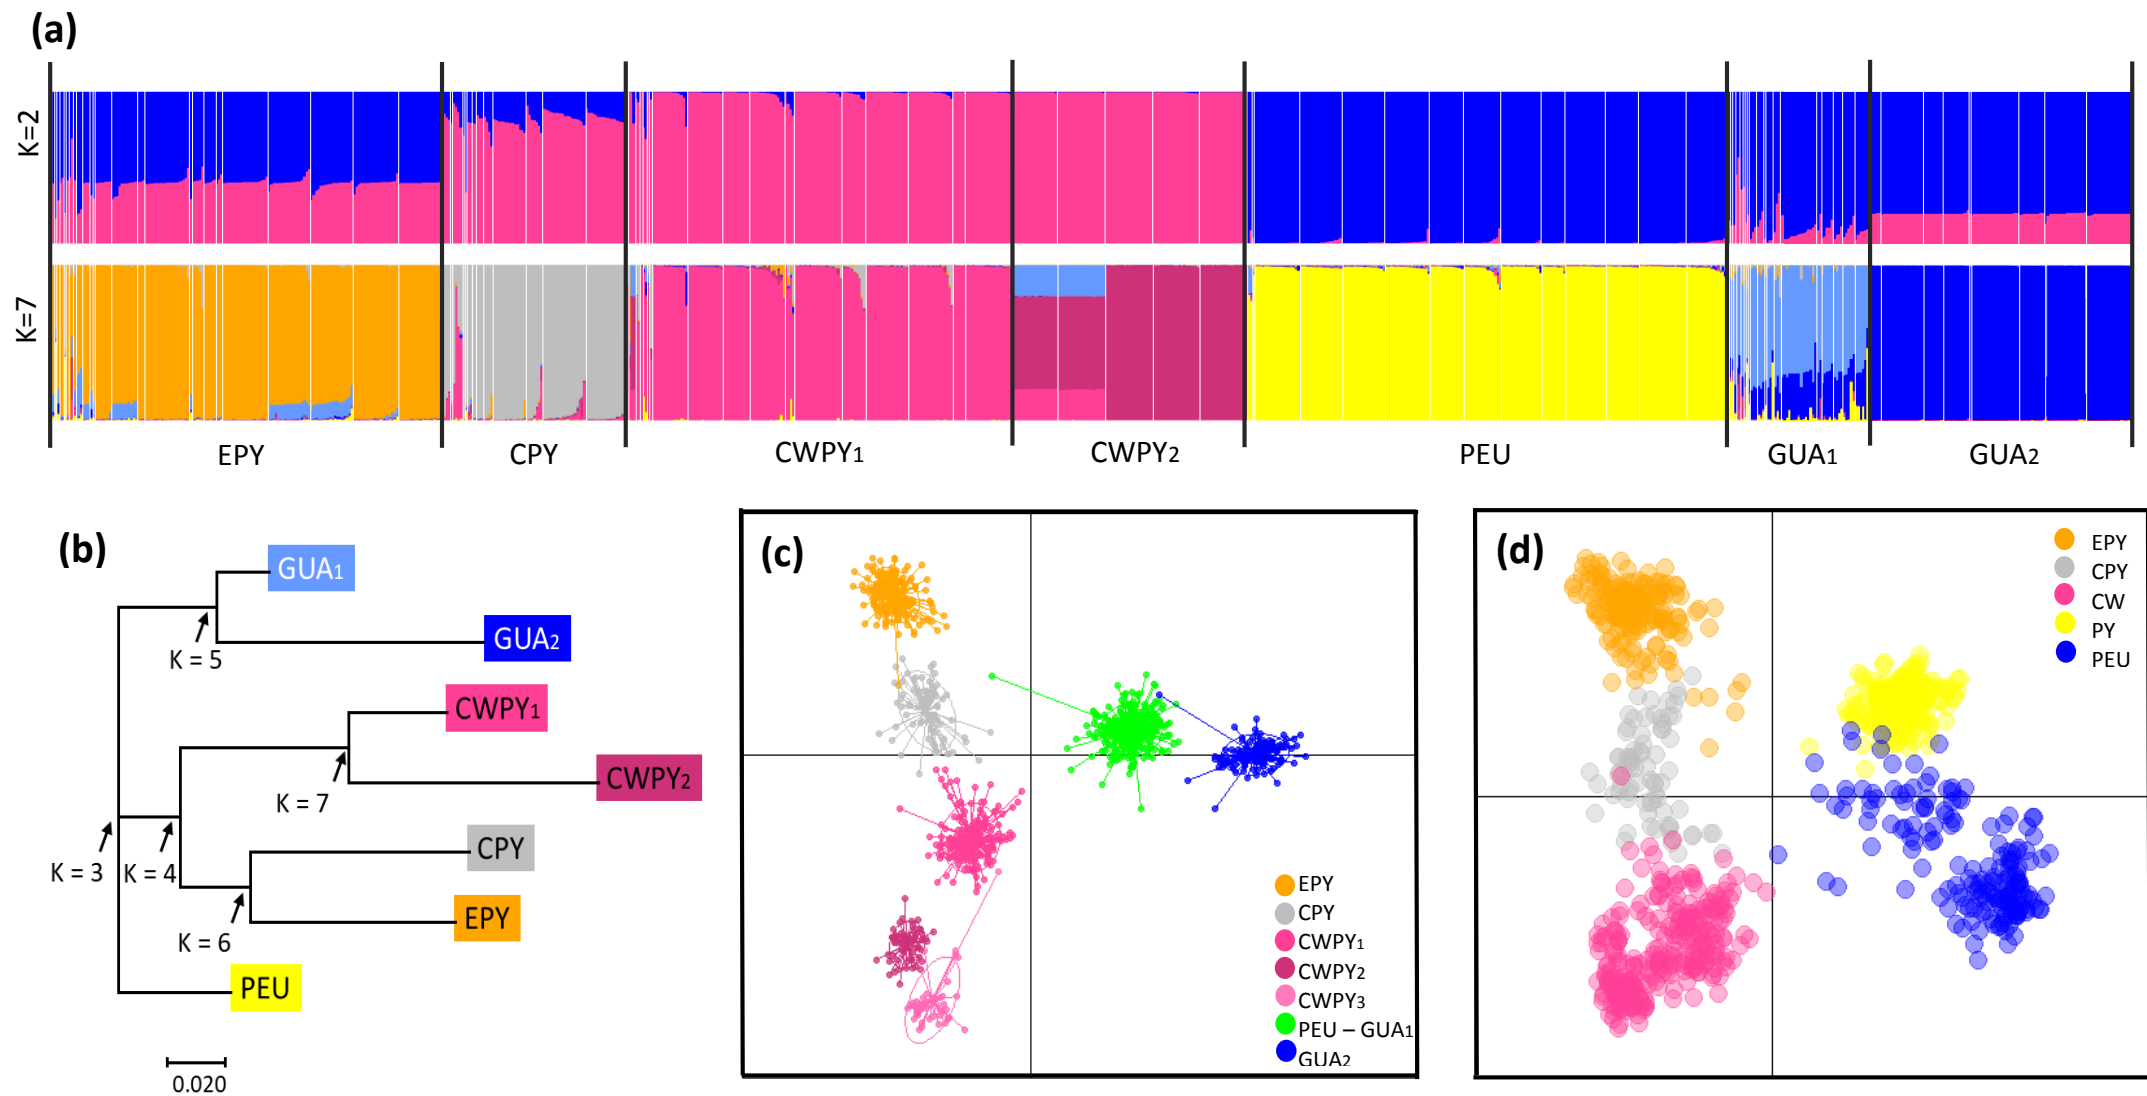

Fig 5

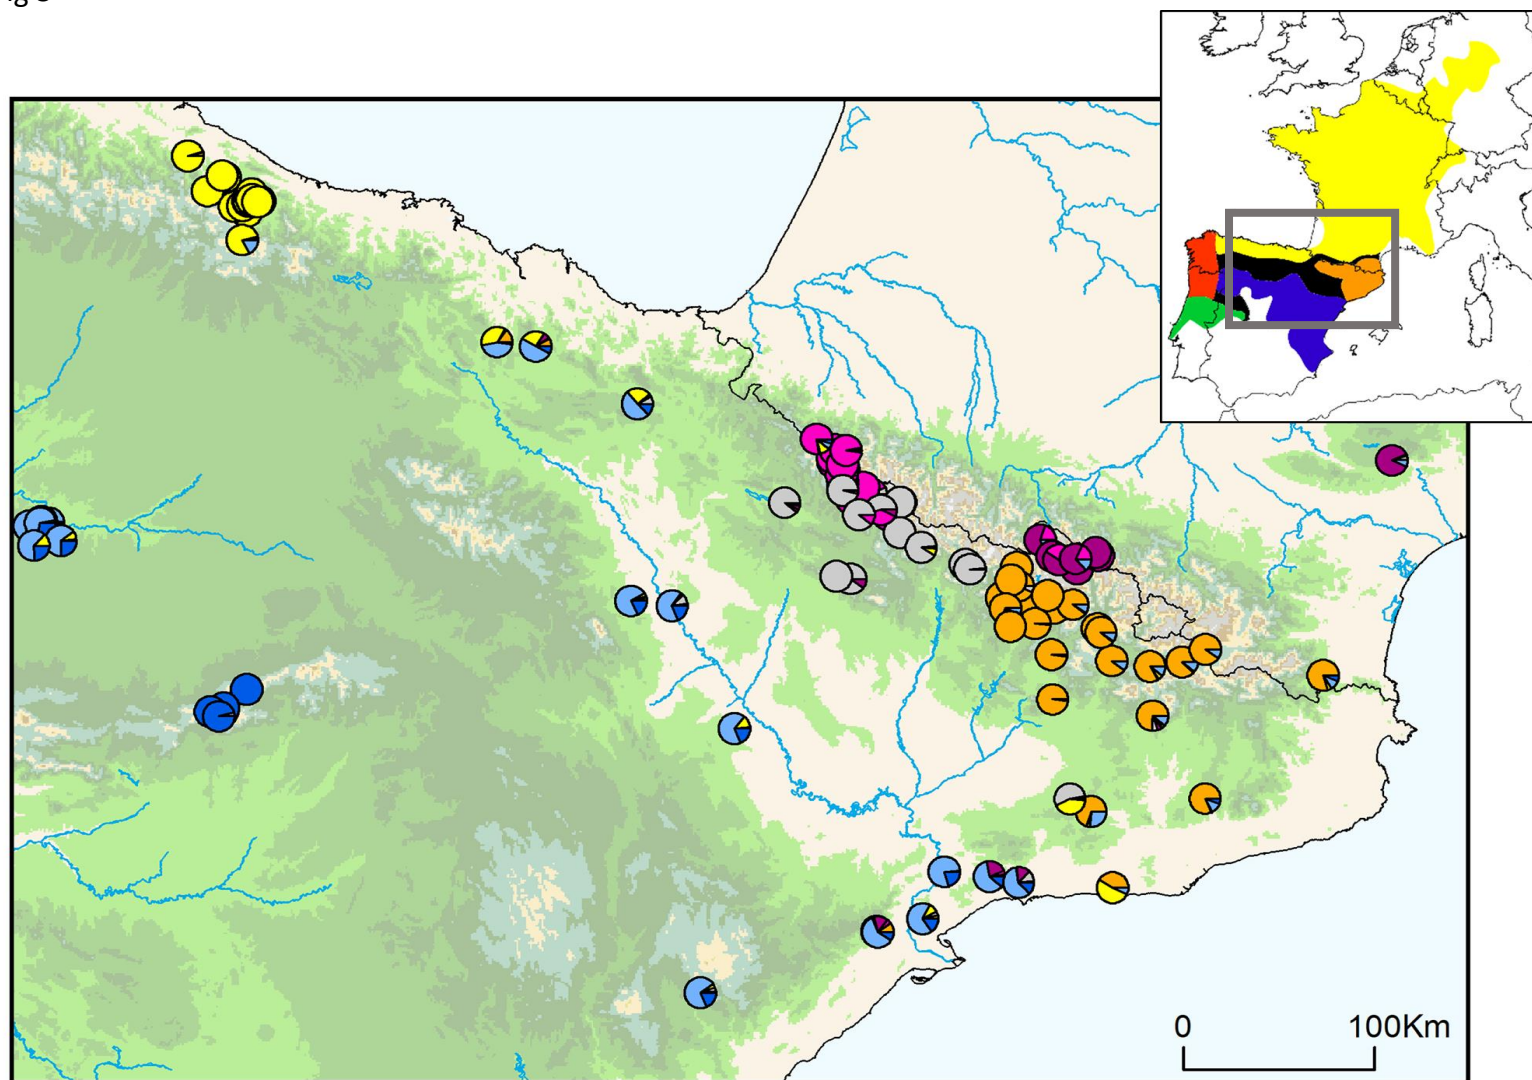



Fig 6

**(a)**

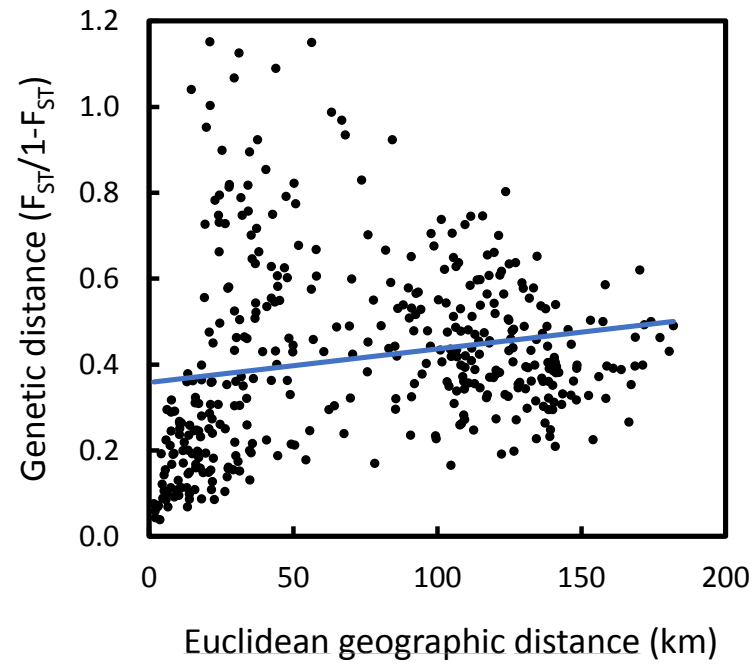

**(b)**

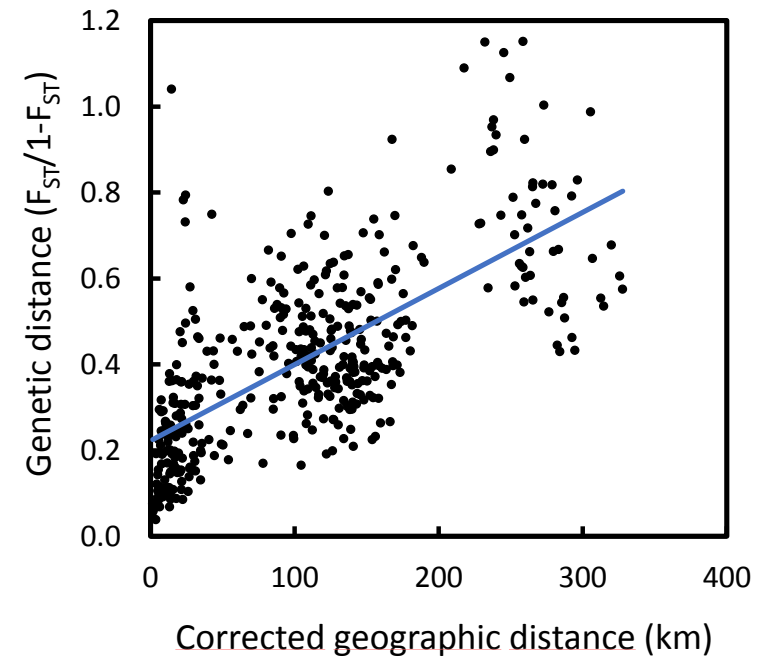

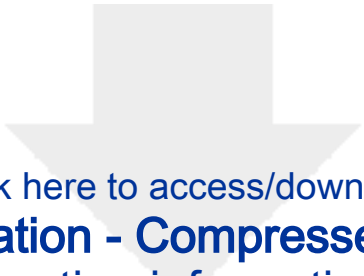

[Click here to access/download](#)

**Supporting Information - Compressed/ZIP File Archive**  
Supporting information.zip

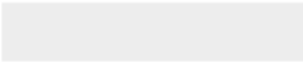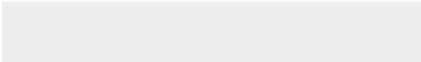

Source: https://www.biorxiv.org/content/10.1101/2022.05.12.490531v1.full.pdf
